# Supplementary material for: A protocol for a prospective observational study using chest and thumb ECG: transient ECG assessment in stroke evaluation (TEASE) in Sweden
Source: PubMed Central journal article supplement — BMJ Open. 2018 Apr 3;8(4):e019933. doi: 10.1136/bmjopen-2017-019933 (PMC5892735; doi:10.1136/bmjopen-2017-019933), 2018-04-03
Supplement: bmjopen-2017-019933.draft_revisions.pdf [file bmjopen-2017-019933.draft_revisions.pdf]

# BMJ Open

BMJ Open is committed to open peer review. As part of this commitment we make the peer review history of every article we publish publicly available.

When an article is published we post the peer reviewers' comments and the authors' responses online. We also post the versions of the paper that were used during peer review. These are the versions that the peer review comments apply to.

The versions of the paper that follow are the versions that were submitted during the peer review process. They are not the versions of record or the final published versions. They should not be cited or distributed as the published version of this manuscript.

BMJ Open is an open access journal and the full, final, typeset and author-corrected version of record of the manuscript is available on our site with no access controls, subscription charges or pay-per-view fees (<http://bmjopen.bmj.com>).

If you have any questions on BMJ Open's open peer review process please email [info.bmjopen@bmj.com](mailto:info.bmjopen@bmj.com)

# BMJ Open

## Transient Electrocardiogram Assessment in Stroke Evaluation (TEASE)– rationale and design: a prospective observational study using chest and thumb- ECG.

|                               |                                                                                                                                                                                                                                                                                                                                                                                                                           |
|-------------------------------|---------------------------------------------------------------------------------------------------------------------------------------------------------------------------------------------------------------------------------------------------------------------------------------------------------------------------------------------------------------------------------------------------------------------------|
| Journal:                      | <i>BMJ Open</i>                                                                                                                                                                                                                                                                                                                                                                                                           |
| Manuscript ID                 | bmjopen-2017-019933                                                                                                                                                                                                                                                                                                                                                                                                       |
| Article Type:                 | Protocol                                                                                                                                                                                                                                                                                                                                                                                                                  |
| Date Submitted by the Author: | 05-Oct-2017                                                                                                                                                                                                                                                                                                                                                                                                               |
| Complete List of Authors:     | Magnusson, Peter; Karolinska Institutet, Cardiology Research Unit, Department of Medicine; Uppsala University, 2. Centre for Research and Development, Uppsala University/Region Gävleborg<br>Koyi, Hirsh; Uppsala University, Centre for Research and Development, Uppsala University/Region Gävleborg<br>Mattsson, Gustav; Uppsala University, Centre for Research and Development, Uppsala University/Region Gävleborg |
| Keywords:                     | Adult cardiology < CARDIOLOGY, Pacing & electrophysiology < CARDIOLOGY, Cardiology < INTERNAL MEDICINE, Stroke medicine < INTERNAL MEDICINE                                                                                                                                                                                                                                                                               |
|                               |                                                                                                                                                                                                                                                                                                                                                                                                                           |

SCHOLARONE™  
Manuscripts

1  
2  
3 **Transient Electrocardiogram Assessment in Stroke Evaluation (TEASE)–**  
4 **rationale and design: a prospective observational study using chest and**  
5 **thumb- ECG.**  
6  
7  
8  
9

10 Peter Magnusson<sup>1,2</sup> Hirsh Koyi<sup>2</sup> Gustav Mattsson<sup>2</sup>

- 11  
12 5 1. Cardiology Research Unit, Department of Medicine, Karolinska Institutet, Stockholm, SE-171 76,  
13 SWEDEN  
14  
15 2. Centre for Research and Development, Uppsala University/Region Gävleborg, Gävle, SE-801 87,  
16 SWEDEN  
17  
18  
19  
20

21 10

22  
23 **Correspondence to:**

24 Peter Magnusson

25 Cardiology Research Unit, Department of Medicine

26 Karolinska Institutet

27  
28  
29  
30 15 Karolinska University Hospital/Solna

31 SE-171 76 Stockholm, SWEDEN

32  
33 Phone: +46(0)705 089407

34 Fax: +46(0)26 154255

35 E-mail: peter.magnusson@regiongavleborg.se  
36  
37  
38  
39 20  
40  
41  
42  
43  
44  
45  
46  
47  
48 25  
49  
50  
51  
52  
53  
54  
55  
56  
57  
58  
59  
60

## ABSTRACT

**Introduction:** Atrial fibrillation (AF) causes ischemic stroke and based on risk factor evaluation warrants anticoagulation therapy. In stroke survivors, AF is typically detected with short-term ECG monitoring in the stroke unit. Prolonged continuous ECG monitoring is impractical and requires substantial resources while insertable cardiac monitors are invasive and costly. Chest and thumb-ECG could provide an alternative for AF detection post-stroke.

The primary objective of our study is to assess the incidence of newly diagnosed AF during 28 days of chest and thumb-ECG monitoring in patients with cryptogenic stroke. Secondary objectives are to assess health-related quality of life (HRQoL) using SF-36 and the feasibility of the Coala Heart Monitor™ in patients with stroke.

**Methods:** Stroke survivors in Region Gävleborg, Sweden, will be eligible for the study from October 2017. Patients with a history of ischemic stroke without documented AF before or during ECG evaluation in the stroke unit will be evaluated by the chest and thumb-ECG system Coala Heart Monitor.™ The monitoring system is connected to a smartphone application which allows for remote monitoring and prompt advice on clinical management. Over a period of 28 days, patients will be monitored twice daily and may activate the ECG recording at symptoms. Upon completion, the system is returned by mail. This system offers a possibility to evaluate the presence of AF post-stroke, but the feasibility of this system in patients who recently suffered from a stroke is unknown. In addition HRQoL using SF-36 in comparison to Swedish population norms will be assessed. The feasibility of the Coala Heart Monitor™ will be assessed by a self-developed questionnaire.

1  
2  
3 **Ethics and dissemination:** The study was approved by The Regional Ethical  
4 Committee in Uppsala (2017/321) and registered at Clinical Trial Registration  
5 NCT03301662.  
6  
7  
8  
9  
10  
11  
12  
13  
14  
15  
16  
17  
18  
19  
20  
21  
22  
23  
24  
25  
26  
27  
28  
29  
30  
31  
32  
33  
34  
35  
36  
37  
38  
39  
40  
41  
42  
43  
44  
45  
46  
47  
48  
49  
50  
51  
52  
53  
54  
55  
56  
57  
58  
59  
60

For peer review only

## Strengths and limitations of this study

- Chest and thumb-ECG evaluation applied after 24-hour ECG Holter at the stroke unit after confirmation of ischemic stroke.
- Usage of a smartphone application for storage of chest and thumb-ECG which may improve compliance and facilitate fast evaluation by the health-care provider in order to prescribe an anticoagulant when indicated.
- Prospective design including consecutive patients which eliminate both selection and tertiary center bias.
- Management of short (30 seconds) AF episodes, detected by non 12-lead ECG, lack evidence from randomized controlled trials with regard to benefit of anticoagulation.
- The small sample size (n=100) may imply type-II errors in subgroup analyses.

**Keywords:** atrial fibrillation, cryptogenic stroke, ECG screening, health-related quality of life, SF-36, stroke, thumb-ECG

## INTRODUCTION

Atrial fibrillation (AF) causes stroke and systemic embolization, but these devastating events can be prevented by anticoagulant therapy.<sup>1</sup> A non-vitamin K antagonist oral anticoagulant (NOAC) is the preferred choice and effectively reduce the risk of stroke and mortality.<sup>2</sup> A meta-analysis of the pivotal NOAC trials showed a 19% reduction of stroke/systemic embolism and 10% lower mortality compared to warfarin.<sup>2</sup> If AF is not diagnosed, antiplatelet medication is current practice following a stroke.<sup>3</sup> According to the European Society of Cardiology (ESC), antiplatelet monotherapy should not be considered in the presence of AF, regardless of the stroke risk.<sup>4-6</sup> Stroke is a leading cause of disability and death and is the incidence is increasing due to ageing populations and the growing prevalence risk factors such as diabetes and hypertension.<sup>7-9</sup> At least 20-30% of patients with ischemic stroke have a documented episode of AF before, during, or after the event, but in a quarter of these patients, the stroke is cryptogenic, meaning that no etiologic factor can be determined.<sup>10-12</sup> However, the proportion of cryptogenic stroke from studies varies due to heterogeneity of cohorts and evaluation tools.

Possibilities for AF detection include monitoring in the hospital ward, repeated electrocardiograms (ECG), Holter monitoring, external event or loop recorders, and long-term outpatient monitoring. Insertable cardiac monitors in cryptogenic stroke yields an AF diagnosis in 8.9% at 6 months and 12.4% at 12 months, but this strategy has not been endorsed in current practice as it requires considerable resources and imply high costs.<sup>6,13</sup> Episodes of AF may be silent, that is not recognized or reported by the patient, but are nevertheless associated with the same risk of embolization.<sup>14-16</sup> In patients with either dual-chamber pacemakers or implantable defibrillators and with no documented history of AF, 10.1% had episodes

1  
2  
3 of high-rate atrial tachycardia and this was also associated with an increased risk of  
4  
5 stroke.<sup>17</sup>

6  
7  
8 Sequential stratified ECG monitoring detected AF in 24% of stroke patients in one  
9  
10 study.<sup>10</sup> The diagnostic yield was 11.5% in a pooled analysis, but this yield varies  
11  
12 with such study factors as timing, length of registration, and the monitoring tool.<sup>18</sup> In  
13  
14 unselected stroke patients, 24-hour monitoring found AF in only 2.4%.<sup>19</sup> This may  
15  
16 vary substantially with the recording technique; in a recent study, AF (defined as  $\geq 30$   
17  
18 seconds in duration) was detected in 16.1% of patients monitored by an 30-day  
19  
20 event-triggered recorder compared to 3.2% of patients monitored by 24-hour ECG.<sup>20</sup>

21  
22  
23 10 A large multicenter study of stroke patients on Holter monitoring reported new  
24  
25 diagnoses of AF in 2.6% of patients at 24 hours and 4.3% at 72 hours.<sup>12</sup> In another  
26  
27 study, AF was detected in 8.3% of stroke patients monitored by continuous ECG for  
28  
29 a median of 89 hours in the stroke unit; ECG monitoring was superior to 24-hour  
30  
31 Holter monitoring in detecting AF.<sup>21</sup>

32  
33  
34 15 Thus, while ECG monitoring for an extended period is important for stroke survivors  
35  
36 post-discharge Holter monitoring is impractical, ECG data storage is limited, and data  
37  
38 interpretation requires considerable resources. Therefore, the thumb-ECG offers  
39  
40 advantages in that it monitors conveniently (typically twice daily) and can be  
41  
42 activated to capture symptomatic episodes. For example, AF was detected in 11.4%  
43  
44 of post-stroke patients monitored by thumb-ECG over 21 days versus 2.8% in those  
45  
46 20 continuously monitored for 48 hours.<sup>22</sup>

47  
48  
49  
50 The thumb-ECG monitor system Zenicor<sup>TM</sup> (Zenicor Medical Systems AB, Stockholm,  
51  
52 Sweden) has been shown to diagnose previously unknown AF in 3.0% of the general  
53  
54 population in Sweden aged 75 years.<sup>23</sup> The Zenicor<sup>TM</sup> system has been developed  
55  
56  
57  
58  
59  
60



1  
2  
3 and integrated into the chest and thumb-ECG Coala Heart Monitor™ (Coala Life AB,  
4 Stockholm, Sweden). The monitoring system utilizes a smartphone application which  
5 allows for remote monitoring by a clinician. This system may help to evaluate the  
6 presence of AF post-stroke. However, feasibility of this system in patients who  
7 recently suffered a stroke has not been studied. In addition health-related quality of  
8 life (HRQoL) using SF-36 in comparison to Swedish population norms will be  
9 assessed.<sup>24,25</sup> The feasibility of the Coala Heart Monitor™ will be assessed by a self-  
10 developed questionnaire (see Supplement).

## 20 OBJECTIVES

21  
22  
23 10 The primary objective is to assess the incidence of newly diagnosed AF during 28  
24 days of chest and thumb-ECG in cryptogenic stroke patients.

25  
26  
27  
28 The secondary objectives are to assesses HRQoL using SF-36 and the feasibility of  
29 the Coala Heart Monitor™ in patients with stroke.

## 33 METHODS

34  
35  
36 15 *Setting and selection*

37  
38  
39 Patients with a clinically confirmed diagnosis of ischemic stroke will be recruited from  
40 the catchment area of Region Gävleborg, Sweden. Eligible patients will be identified  
41 from daily checks of the medical records in the stroke unit. The recruitment is  
42 planned to start in October 2017.

43  
44  
45  
46  
47  
48 20 *Inclusion and exclusion*

49  
50  
51 Patients, aged  $\geq 18$  years, with a validated diagnosis of ischemic cryptogenic stroke  
52 are eligible for the study. For screening with chest and thumb-ECG, exclusion criteria  
53 are as follows: previously known atrial arrhythmia with an indication for  
54  
55  
56  
57  
58  
59  
60

1  
2  
3 anticoagulation, implantable defibrillator, pacemaker or insertable cardiac monitor,  
4 pregnancy, permanent indication for anticoagulation (including low-molecular weight  
5 heparin) due to atrial arrhythmia, mechanical heart valve, deep vein thrombosis, or  
6 pulmonary embolism. Patients with a life expectancy  $\leq 6$  months (e.g. severe heart  
7 failure New York Heart Association [NYHA] functional class IV or malignancy) are  
8 likewise excluded.

### 15 *Variables*

16  
17  
18 Atrial arrhythmia is defined as AF, atrial flutter, or ectopic atrial tachycardia with a  
19 duration of at least 30 seconds. Patients characteristics are age, sex, date of current  
20 ischemic stroke, previous stroke, known AF, medication (warfarin, NOAC, antiplatelet  
21 therapy), heart failure, hypertension, diabetes mellitus, vascular disease (peripheral  
22 vascular disease, aortic plaque, coronary artery disease), National Institutes of  
23 Health Stroke Scale (NIHSS), 12-lead ECG, and when applicable imaging from  
24 carotid-Doppler, computerized tomography, echocardiography, or transesophageal  
25 echocardiography, as well as coagulation laboratory examination.

### 36 *Outcome measurements*

37  
38  
39 Outcome measurements are arrhythmias recorded by chest and thumb-ECG  
40 obtained during scheduled twice-daily recordings or by patient-activated recordings.

41  
42 Each episode will be classified as AF, atrial flutter, ectopic atrial tachycardia,  
43 ventricular tachycardia, premature ventricular complex, or supraventricular ventricular  
44 complex. The date and time of each episode will be recorded.

### 51 *Research questions and endpoints*

52  
53  
54 The primary endpoint is 28 day cumulative incidence of atrial arrhythmia at 28 days.

### *Secondary endpoints*

- a) The prevalence of previously known atrial arrhythmia before cryptogenic stroke and the number of these patients who had anticoagulant therapy.
- b) Compliance with chest and thumb-ECG at week four (number of recorded scheduled ECG tracings).
- c) Patient-reported experience with chest and thumb-ECG measured at week six (questionnaire as Supplement).
- d) HRQoL (SF-36) at week 6 and at 12 months and the association with AF and compliance with chest and thumb-ECG.
- e) Cumulative incidence of stroke (and all-cause mortality) after three years in patients with AF versus without AF.

### *Chest and thumb-ECG*

Patients will be asked to use the chest and thumb-ECG monitor device twice daily, once between the hours of 6:00 and 10:00 a.m. and again between 6:00 and 10:00 p.m.

If the patients feel palpitations or other symptoms suggestive of arrhythmia (e.g. sudden onset of tiredness, presyncope, syncope) they are asked to record the episode with the smartphone application. Each patient is monitored for four consecutive weeks, after which the device is returned by mail to the investigators.

### *Power analysis*

A power analysis<sup>26</sup> based on previous research findings and estimation of outcome to 2.4%, 95% confidence interval, width of confidence interval 5, standard deviation 12

1  
2  
3 results in a sample size of 89. There is likely to be drop-out of patients who are  
4  
5 unable or unwilling to meet the monitoring requirements; thus, an estimated 120  
6  
7 patients should be included in order to have 100 patients complete the chest and  
8  
9 thumb-ECG evaluation.  
10

## 11 12 5 *Statistics*

13  
14 Descriptive data will be reported as frequencies, percentages, means, and  
15  
16 percentiles. Continuous variables are summarized as means, standard deviations,  
17  
18 and percentiles, and *t*-tests for group comparisons, while chi-squared test is used for  
19  
20 categorical variables. Kaplan-Meier estimates are used to describe time to event  
21  
22 analysis, and cumulative incidence at 1, 2, 3, and 4 weeks will be reported. Statistical  
23  
24 significance is defined as a two-sided *p*-value of <0.05. The data will be stored in  
25  
26 Excel 2010 (Microsoft Corporation, Redmond, WA) and imported into SPSS version  
27  
28 22 (IBM, Armonk, NY) for analyses.  
29  
30  
31

## 32 33 *Ethics and dissemination*

34  
35 15 The Regional Ethical Committee in Uppsala approved the study the 20<sup>th</sup> of  
36  
37 September 2017 (protocol number 2017/321). The study protocol, including variables  
38  
39 and prespecified research questions, were registered at Clinical Trial Registration  
40  
41 NCT03301662 and approved 3rd of October 2017. The documentaton of research  
42  
43 data and management of the study follow the Guideline for Good Clinical Practice.<sup>27</sup>  
44  
45  
46 20 Each patient is informed about the study by a physician and nurse and included after  
47  
48 written consent. After the study is completed, the database will be closed and  
49  
50 followed by statistical analyses, interpretation of results, and dissemination to  
51  
52 scientific journals.  
53  
54

## 55 56 **DISCUSSION**

1  
2  
3 Since anticoagulation therapy has been proven effective in preventing ischemic  
4 stroke in patients with AF, reliable AF detection following cryptogenic stroke is  
5 crucial.<sup>6</sup> Hence, prolonged ECG monitoring is reasonable, especially in patients at  
6 high risk of embolization. Ischemic stroke risk stratification and the decision to  
7  
8  
9  
10  
11 5 prescribe anticoagulants is based on CHA2DS2-VASc scores; a prior history of  
12 stroke counts for two points, which suffices as a rationale for anticoagulation.<sup>6</sup> The  
13 vast majority of stroke patients typically have multiple risk factors, and stroke risk  
14 increases with more risk factors.<sup>28</sup> ESC guidelines already allow for prolonged  
15 monitoring of these patients: "In stroke patients, additional ECG monitoring by long-  
16  
17  
18  
19  
20  
21  
22 10 term noninvasive or implanted loop recorders should be considered to document  
23 silent atrial fibrillation" (Class IIa recommendation, level of evidence B).<sup>6</sup> However,  
24 since the CRYSTAL-AF trial<sup>13</sup>, current practice in Sweden remains unchanged with  
25  
26  
27  
28  
29  
30  
31  
32  
33 15 in that it provides an alternative and advantageous cost-benefit profile in mass  
34 screening.<sup>30</sup> Stroke patients have a higher risk for recurrent stroke and higher  
35 incidences of AF, so noninvasive thumb-ECG monitoring may be of even greater  
36  
37  
38  
39  
40  
41  
42  
43  
44 20 regard to healthcare economics.

45  
46  
47 The use of the thumb-ECG has been studied in a Swedish setting for stroke patients,  
48 but the study was retrospective, with data gathered at different times after the stroke,  
49 and the monitoring method was selected based on the physician's preference, which  
50  
51  
52  
53  
54  
55 25 implies bias. Our prospective study includes consecutive stroke patients without  
56 referral center bias.<sup>31</sup> This will provide a basis to estimate AF incidence over an  
57  
58  
59  
60

1  
2  
3 extended period of 28 days. Continuous Holter monitoring may be associated with  
4 poor compliance, technical difficulties, and time-consuming analyses of extensive  
5 amounts of data by healthcare providers.<sup>31,32</sup> The newly developed Coala Heart  
6 Monitor™ with the proven detection algorithms from Zenicor™ using a smartphone  
7 application seem to be a promising alternative, but feasibility remains to be studied.  
8  
9 Therefore we added a questionnaire to address feasibility issues.  
10  
11  
12  
13  
14  
15

16 Although a thumb-ECG may provide an attractive method of noninvasive AF  
17 detection, there remain some controversies with regard to short-term anticoagulation  
18 for AF. The potential benefits of anticoagulation therapy for short-term AF would be  
19 challenging to study because it would require long-term follow-up, demands a large  
20 sample size, and raises ethical concerns about withholding anticoagulation from a  
21 stroke survivor. This proposed prospective observational trial of consecutive stroke  
22 patients using thumb-ECG has the prerequisites to evaluate outcome at 28 days and  
23 analyze the clinical feasibility of the Coala Heart Monitor.™  
24  
25  
26  
27  
28  
29  
30  
31  
32

### 33 34 **Acknowledgements**

35 The authors acknowledge editing by Jo Ann LeQuang of LeQ Medical who reviewed  
36 the manuscript for American English. Ulf Tossman and Philip Siberg from Coala Life  
37 for support regarding the Coala Life Monitor.™  
38  
39  
40  
41  
42  
43

### 44 **Author contributions**

45  
46  
47 20 PM: idea, design, project management, and writing of the manuscript. HK: critical  
48 revision GM: idea, design, project management, critical revision.  
49  
50

### 51 **Funding**

1  
2  
3 Region Gävleborg funded this research project and Coala Life provided free product  
4  
5 Coala Heart Monitor™ during the study period.  
6  
7

### 8 **Competing interests**

9  
10 The authors received free product from Coala Life.  
11  
12

### 13 **5 Ethics approval**

14  
15  
16 The study was approved by the Regional Ethical committee in Uppsala (Dnr  
17  
18 2017/321).  
19  
20

### 21 **REFERENCES**

- 22  
23  
24 1. Hart RG, Pearce LA, Aguilar MI. Meta-analysis: antithrombotic therapy to prevent  
25  
26 10 stroke in patients who have nonvalvular atrial fibrillation. *Ann Intern Med*  
27  
28 2007;146:857–67.  
29  
30  
31 2. Ruff CT, Giugliano RP, Braunwald E, et al. Comparison of the efficacy and safety  
32  
33 of new oral anticoagulants with warfarin in patients with atrial fibrillation: a meta-  
34  
35 analysis of randomised trials. *Lancet* 2014;383:955-62.  
36  
37  
38 15 3. Kernan WN, Ovbiagele B, Black HR, et al. American Heart Association Stroke  
39  
40 Council, Council on Cardiovascular and Stroke Nursing, Council on Clinical  
41  
42 Cardiology, and Council on Peripheral Vascular Disease. Guidelines for the  
43  
44 prevention of stroke in patients with stroke and transient ischemic attack: a guideline  
45  
46 for healthcare professionals from the American Heart Association/American Stroke  
47  
48 20 Association. *Stroke* 2014;45:2160-236.  
49  
50  
51 4. Olesen JB, Lip GY, Lindhardsen J, et al. Risks of thromboembolism and bleeding  
52  
53 with thromboprophylaxis in patients with atrial fibrillation: A net clinical benefit  
54  
55  
56  
57  
58  
59  
60

- 1  
2  
3 analysis using a 'real world' nationwide cohort study. *Thromb Haemost*  
4 2011;106:739-49.  
5  
6  
7  
8 5. Sjalander S, Sjalander A, Svensson PJ, et al. Atrial fibrillation patients do not  
9 benefit from acetylsalicylic acid. *Europace* 2014;16:631-8.  
10  
11  
12 5 6. Kirchhof P, Benussi S, Kotecha D, et al. 2016 ESC Guidelines for the  
13 management of atrial fibrillation developed in collaboration with EACTS. *Eur Heart J*  
14 2016;37:2893-962.  
15  
16  
17  
18 7. Schnabel RB, Yin X, Gona P, et al. 50 year trends in atrial fibrillation prevalence,  
19 incidence, risk factors, and mortality in the Framingham Heart Study: a cohort study.  
20  
21  
22  
23 10 *Lancet* 2015;386:154-62.  
24  
25  
26  
27 8. Andersson T, Magnuson A, Bryngelsson IL, et al. All-cause mortality in 272,186  
28 patients hospitalized with incident atrial fibrillation 1995-2008: a Swedish nationwide  
29 long-term case-control study. *Eur Heart J* 2013;34:1061-7.  
30  
31  
32  
33  
34 9. Go AS, Mozaffarian D, Roger VL, et al. American Heart Association Statistics  
35  
36 15 Committee and Stroke Statistics Subcommittee. Heart disease and stroke statistics--  
37 2014 update: a report from the American Heart Association. *Circulation*  
38 2014;129:e28-e292.  
39  
40  
41  
42  
43 10. Kishore A, Vail A, Majid A, et al. Detection of atrial fibrillation after ischemic  
44 stroke or transient ischemic attack: a systematic review and meta-analysis. *Stroke*  
45  
46  
47 20 2014;45:520-6.  
48  
49  
50  
51 11. Henriksson KM, Farahmand B, Asberg S, et al. Comparison of cardiovascular  
52 risk factors and survival in patients with ischemic or hemorrhagic stroke. *Int J Stroke*  
53 2012;7:276-81.  
54  
55  
56  
57  
58  
59  
60



- 1  
2  
3 12. Grond M, Jauss M, Hamann G, et al. Improved detection of silent atrial fibrillation  
4 using 72-hour Holter ECG in patients with ischemic stroke: a prospective multicenter  
5 cohort study. *Stroke* 2013;44:3357-64.  
6  
7  
8  
9  
10 13. Sanna T, Diener HC, Passman RS, et al. CRYSTAL AF Investigators.  
11  
12 5 Cryptogenic stroke and underlying atrial fibrillation. *N Engl J Med* 2014;370:2478-86.  
13  
14  
15 14. Savelieva I, Camm AJ. Clinical relevance of silent atrial fibrillation: prevalence,  
16 prognosis, quality of life, and management. *J Interv Card Electrophysiol* 2000;4:369-  
17 82.  
18  
19  
20  
21  
22 15. Friberg L, Hammar N, Rosenqvist M. Stroke in paroxysmal atrial fibrillation: report  
23  
24 10 from the Stockholm Cohort of Atrial Fibrillation. *Eur Heart J* 2010;31:967-75.  
25  
26  
27 16. Vanassche T, Lauw MN, Eikelboom JW, et al. Risk of ischaemic stroke according  
28 to pattern of atrial fibrillation: analysis of 6563 aspirin-treated patients in ACTIVE-A  
29 and AVERROES. *Eur Heart J* 2015;36:281-87.  
30  
31  
32  
33  
34 17. Healey JS, Connolly SJ, Gold MR, et al. ASSERT Investigators. Subclinical atrial  
35  
36 15 fibrillation and the risk of stroke. *N Engl J Med* 2012;366:120-9.  
37  
38  
39 18. Sposato LA, Cipriano LE, Saposnik G, et al. Diagnosis of atrial fibrillation after  
40 stroke and transient ischaemic attack: a systematic review and meta-analysis. *Lancet*  
41 *Neurol* 2015;14:377-87.  
42  
43  
44  
45  
46 19. Shafqat S, Kelly PJ, Furie KL, et al. Holter monitoring in the diagnosis of stroke  
47  
48 20 mechanism. *Intern Med J* 2004;34:305-9.  
49  
50  
51 20. Gladstone DJ, Spring M, Dorian P, et al; EMBRACE Investigators and  
52 Coordinators. Atrial fibrillation in patients with cryptogenic stroke. *N Engl J Med*  
53 2014;370:2467-77.  
54  
55  
56  
57  
58  
59  
60

- 1  
2  
3 21. Rizos T, Guntner J, Jenetzky E, et al. Continuous stroke unit electrocardiographic  
4 monitoring versus 24-hour Holter electrocardiography for detection of paroxysmal  
5 atrial fibrillation after stroke. *Stroke* 2012;43:2689-94.  
6  
7  
8  
9  
10 22. Orrsjö G, Cederin B, Bertholds E, et al. Screening of Paroxysmal Atrial Fibrillation  
11 after Ischemic Stroke: 48-Hour Holter Monitoring versus Prolonged Intermittent ECG  
12 5 Recording. *ISRN Stroke* 2014 Article ID 208195, 6 pages.  
13  
14  
15  
16  
17 23. Friberg L, Engdahl J, Frykman V, et al. Population screening of 75- and 76-year-  
18 old men and women for silent atrial fibrillation (STROKESTOP). *Europace*  
19 2013;15:135-40.  
20  
21  
22  
23  
24 10 24. McHorney CA, Ware Jr JE, Lu JF, et al. The MOS 36-item Short-Form Health  
25 Survey (SF-36): III. Tests of data quality, scaling assumptions, and reliability across  
26 diverse patient groups. *Med Care* 1994;32:40–66.  
27  
28  
29  
30  
31 25. Sullivan M, Karlsson J, Ware Jr JE. The Swedish SF-36 Health Survey I.  
32 Evaluation of data quality, scaling assumptions, reliability and construct validity  
33 15 across general populations in Sweden. *Soc Sci Med* 1995;41:1349–58.  
34  
35  
36  
37  
38 26. Hulley SB, Cummings SR, Browner WS, et al. Designing clinical research: an  
39 epidemiologic approach. 4th ed. Philadelphia, PA: Lippincott Williams & Wilkins;  
40 2013. Appendix 6D, page 80.  
41  
42  
43  
44  
45 27. European Medicines Agency (2002) ICH harmonised tripartite guideline E6. In:  
46 20 EMA, eds. Note for Guidance on Good Clinical Practice (PMP/ICH/135/95).  
47  
48  
49  
50 28. Gage BF, Waterman AD, Shannon W, et al. Validation of clinical classification  
51 schemes for predicting stroke: results from the National Registry of Atrial Fibrillation.  
52 *JAMA* 2001 13;285:2864-70.  
53  
54  
55  
56  
57  
58  
59  
60

- 1  
2  
3 29. Socialstyrelsen. [www.socialstyrelsen.se/nationellariktlinjer/hjartsjukvard](http://www.socialstyrelsen.se/nationellariktlinjer/hjartsjukvard) Retrieved  
4 on 8th of September 2017.  
5  
6  
7 30. Levin LÅ, Husberg M, Sobocinski PD, et al. A cost-effectiveness analysis of  
8 screening for silent atrial fibrillation after ischaemic stroke. *Europace* 2015;17:207-14.  
9  
10  
11  
12 5 31. Stahrenberg R, Weber-Krüger M, J. Seegers J, et al. Enhanced detection of  
13 paroxysmal atrial fibrillation by early and prolonged continuous holter monitoring in  
14 patients with cerebral ischemia presenting in sinus rhythm. *Stroke* 2010;41:2884-8.  
15  
16  
17 32. Seet RCS, Friedman PA, Rabinstein AA. Prolonged rhythm monitoring for the  
18 detection of occult paroxysmal atrial fibrillation in ischemic stroke of unknown cause.  
19  
20  
21  
22  
23  
24 10 *Circulation* 2011;124:477-86.  
25  
26  
27  
28  
29  
30  
31  
32  
33  
34  
35  
36  
37  
38  
39  
40  
41  
42  
43  
44  
45  
46  
47  
48  
49  
50  
51  
52  
53  
54  
55  
56  
57  
58  
59  
60

# BMJ Open

## A protocol for a prospective observational study using chest and thumb- ECG: Transient Electrocardiogram Assessment in Stroke Evaluation (TEASE) in Sweden.

|                                 |                                                                                                                                                                                                                                                                                                                                                                                                                           |
|---------------------------------|---------------------------------------------------------------------------------------------------------------------------------------------------------------------------------------------------------------------------------------------------------------------------------------------------------------------------------------------------------------------------------------------------------------------------|
| Journal:                        | <i>BMJ Open</i>                                                                                                                                                                                                                                                                                                                                                                                                           |
| Manuscript ID                   | bmjopen-2017-019933.R1                                                                                                                                                                                                                                                                                                                                                                                                    |
| Article Type:                   | Protocol                                                                                                                                                                                                                                                                                                                                                                                                                  |
| Date Submitted by the Author:   | 28-Nov-2017                                                                                                                                                                                                                                                                                                                                                                                                               |
| Complete List of Authors:       | Magnusson, Peter; Karolinska Institutet, Cardiology Research Unit, Department of Medicine; Uppsala University, 2. Centre for Research and Development, Uppsala University/Region Gävleborg<br>Koyi, Hirsh; Uppsala University, Centre for Research and Development, Uppsala University/Region Gävleborg<br>Mattsson, Gustav; Uppsala University, Centre for Research and Development, Uppsala University/Region Gävleborg |
| <b>Primary Subject Heading</b>: | Cardiovascular medicine                                                                                                                                                                                                                                                                                                                                                                                                   |
| Secondary Subject Heading:      | Diagnostics                                                                                                                                                                                                                                                                                                                                                                                                               |
| Keywords:                       | Adult cardiology < CARDIOLOGY, Pacing & electrophysiology < CARDIOLOGY, Cardiology < INTERNAL MEDICINE, Stroke medicine < INTERNAL MEDICINE                                                                                                                                                                                                                                                                               |
|                                 |                                                                                                                                                                                                                                                                                                                                                                                                                           |

SCHOLARONE™  
Manuscripts

only

1  
2  
3 **A protocol for a prospective observational study using chest and thumb- ECG:**  
4  
5 **Transient Electrocardiogram Assessment in Stroke Evaluation (TEASE) in**  
6  
7 **Sweden.**  
8

9 Peter Magnusson<sup>1,2</sup> Hirsh Koyi<sup>2</sup> Gustav Mattsson<sup>2</sup>

- 10  
11  
12 5 1. Cardiology Research Unit, Department of Medicine, Karolinska Institutet, Stockholm, SE-171 76,  
13 SWEDEN  
14  
15 2. Centre for Research and Development, Uppsala University/Region Gävleborg, Gävle, SE-801 87,  
16 SWEDEN  
17  
18  
19  
20

21 10

22  
23 **Correspondence to:**

24 Peter Magnusson

25 Cardiology Research Unit, Department of Medicine

26 Karolinska Institutet

27  
28  
29  
30 15 Karolinska University Hospital/Solna

31 SE-171 76 Stockholm, SWEDEN

32  
33 Phone: +46(0)705 089407

34 Fax: +46(0)26 154255

35 E-mail: peter.magnusson@regiongavleborg.se  
36  
37  
38  
39 20

40  
41  
42  
43  
44  
45  
46  
47  
48 25

49  
50  
51  
52  
53  
54  
55  
56  
57  
58  
59  
60

## ABSTRACT

**Introduction:** Atrial fibrillation (AF) causes ischemic stroke and based on risk factor evaluation warrants anticoagulation therapy. In stroke survivors, AF is typically detected with short-term ECG monitoring in the stroke unit. Prolonged continuous ECG monitoring is impractical and requires substantial resources while insertable cardiac monitors are invasive and costly. Chest and thumb-ECG could provide an alternative for AF detection post-stroke.

The primary objective of our study is to assess the incidence of newly diagnosed AF during 28 days of chest and thumb-ECG monitoring in patients with cryptogenic stroke. Secondary objectives are to assesses health-related quality of life (HRQoL) using SF-36 and the feasibility of the Coala Heart Monitor™ in patients with stroke.

**Methods:** Stroke survivors in Region Gävleborg, Sweden, will be eligible for the study from October 2017. Patients with a history of ischemic stroke without documented AF before or during ECG evaluation in the stroke unit will be evaluated by the chest and thumb-ECG system Coala Heart Monitor.™ The monitoring system is connected to a smartphone application which allows for remote monitoring and prompt advice on clinical management. Over a period of 28 days, patients will be monitored twice daily and may activate the ECG recording at symptoms. Upon completion, the system is returned by mail. This system offers a possibility to evaluate the presence of AF post-stroke, but the feasibility of this system in patients who recently suffered from a stroke is unknown. In addition HRQoL using SF-36 in comparison to Swedish population norms will be assessed. The feasibility of the Coala Heart Monitor™ will be assessed by a self-developed questionnaire.

1  
2  
3 **Ethics and dissemination:** The study was approved by The Regional Ethical  
4  
5 Committee in Uppsala (2017/321) and registered at Clinical Trial Registration  
6  
7 NCT03301662. The database will be closed after the last follow-up, followed by  
8  
9 statistical analyses, interpretation of results, and dissemination to a scientific journal.  
10

11  
12 5  
13  
14  
15  
16  
17  
18  
19  
20  
21  
22  
23  
24  
25  
26  
27  
28  
29  
30  
31  
32  
33  
34  
35  
36  
37  
38  
39  
40  
41  
42  
43  
44  
45  
46  
47  
48  
49  
50  
51  
52  
53  
54  
55  
56  
57  
58  
59  
60

For peer review only

## Strengths and limitations of this study

- Chest and thumb-ECG evaluation applied after 24-hour ECG Holter at the stroke unit after confirmation of ischemic stroke.
- Usage of a smartphone application for storage of chest and thumb-ECG which may improve compliance and facilitate fast evaluation by the health-care provider in order to prescribe an anticoagulant when indicated.
- Prospective design including consecutive patients which eliminate both selection and tertiary center bias.
- Management of short (30 seconds) AF episodes, detected by non 12-lead ECG, lack evidence from randomized controlled trials with regard to benefit of anticoagulation.
- The small sample size (n=100) may imply type-II errors in subgroup analyses.

**Keywords:** atrial fibrillation, cryptogenic stroke, ECG screening, health-related quality of life, SF-36, stroke, thumb-ECG



## INTRODUCTION

Atrial fibrillation (AF) causes stroke and systemic embolization, but these devastating events can be prevented by anticoagulant therapy.<sup>1</sup> A non-vitamin K antagonist oral anticoagulant (NOAC) is the preferred choice and effectively reduce the risk of stroke and mortality.<sup>2</sup> A meta-analysis of the pivotal NOAC trials showed a 19% reduction of stroke/systemic embolism and 10% lower mortality compared to warfarin.<sup>2</sup> If AF is not diagnosed, antiplatelet medication is current practice following a stroke.<sup>3</sup> According to the European Society of Cardiology (ESC), antiplatelet monotherapy should not be considered in the presence of AF, regardless of the stroke risk.<sup>4-6</sup> Stroke is a leading cause of disability and death and is the incidence is increasing due to ageing populations and the growing prevalence risk factors such as diabetes and hypertension.<sup>7-9</sup> At least 20-30% of patients with ischemic stroke have a documented episode of AF before, during, or after the event, but in a quarter of these patients, the stroke is cryptogenic, meaning that no etiologic factor can be determined.<sup>10-12</sup> However, the proportion of cryptogenic stroke from studies varies due to heterogeneity of cohorts and evaluation tools.

Possibilities for AF detection include monitoring in the hospital ward, repeated electrocardiograms (ECG), Holter monitoring, external event or loop recorders, and long-term outpatient monitoring. Insertable cardiac monitors in cryptogenic stroke yields an AF diagnosis in 8.9% at 6 months and 12.4% at 12 months, but this strategy has not been endorsed in current practice as it requires considerable resources and imply high costs, even though cost-effectiveness has been suggested.<sup>6,13,14</sup> Episodes of AF may be silent, that is not recognized or reported by the patient, but are nevertheless associated with the same risk of embolization.<sup>15-17</sup> In patients with either dual-chamber pacemakers or implantable defibrillators and with

1  
2  
3 no documented history of AF, 10.1% had episodes of high-rate atrial tachycardia and  
4  
5 this was also associated with an increased risk of stroke.<sup>18</sup>  
6

7  
8 Sequential stratified ECG monitoring detected AF in 24% of stroke patients in one  
9  
10 study.<sup>10</sup> The diagnostic yield was 11.5% in a pooled analysis, but this yield varies  
11  
12 5 with such study factors as timing, length of registration, and the monitoring tool.<sup>19</sup> In  
13  
14 unselected stroke patients, 24-hour monitoring found AF in only 2.4%.<sup>20</sup> This may  
15  
16 vary substantially with the recording technique; in a recent study, AF (defined as  $\geq 30$   
17  
18 seconds in duration) was detected in 16.1% of patients monitored by an 30-day  
19  
20 event-triggered recorder compared to 3.2% of patients monitored by 24-hour ECG.<sup>21</sup>  
21  
22

23 10 A large multicenter study of stroke patients on Holter monitoring reported new  
24  
25 diagnoses of AF in 2.6% of patients at 24 hours and 4.3% at 72 hours.<sup>12</sup> In another  
26  
27 study, AF was detected in 8.3% of stroke patients monitored by continuous ECG for  
28  
29 a median of 89 hours in the stroke unit; ECG monitoring was superior to 24-hour  
30  
31 Holter monitoring in detecting AF.<sup>22</sup>  
32  
33

34 15 Thus, while ECG monitoring for an extended period is important for stroke survivors  
35  
36 post-discharge Holter monitoring is impractical, ECG data storage is limited, and data  
37  
38 interpretation requires considerable resources. Therefore, the thumb-ECG offers  
39  
40 advantages in that it monitors conveniently (typically twice daily) and can be  
41  
42 activated to capture symptomatic episodes. For example, AF was detected in 11.4%  
43  
44 20 of post-stroke patients monitored by thumb-ECG over 21 days versus 2.8% in those  
45  
46 continuously monitored for 48 hours.<sup>23</sup>  
47  
48  
49

50 The thumb-ECG monitor system Zenicor<sup>TM</sup> (Zenicor Medical Systems AB, Stockholm,  
51  
52 Sweden) has been shown to diagnose previously unknown AF in 3.0% of the general  
53  
54 population in Sweden aged 75 years.<sup>24</sup> The Zenicor<sup>TM</sup> system has been developed  
55  
56  
57  
58  
59  
60

1  
2  
3 and integrated into the chest and thumb-ECG Coala Heart Monitor™ (Coala Life AB,  
4 Stockholm, Sweden). The monitoring system utilizes a smartphone application which  
5 allows for remote monitoring by a clinician. This system may help to evaluate the  
6 presence of AF post-stroke. However, feasibility of this system in patients who  
7 recently suffered a stroke has not been studied. In addition health-related quality of  
8 life (HRQoL) using SF-36 in comparison to Swedish population norms will be  
9 assessed.<sup>25,26</sup> The feasibility of the Coala Heart Monitor™ will be assessed by a self-  
10 developed questionnaire (see Supplement).

## 20 OBJECTIVES

21  
22  
23 10 The primary objective is to assess the incidence of newly diagnosed AF during 28  
24 days of chest and thumb-ECG in cryptogenic stroke patients.

25  
26  
27  
28 The secondary objectives are to assesses HRQoL using SF-36 and the feasibility of  
29 the Coala Heart Monitor™ in patients with stroke.

## 33 METHODS

34  
35  
36 15 *Setting and selection*

37  
38  
39 Patients with a clinically confirmed diagnosis of ischemic stroke will be recruited from  
40 the catchment area of Region Gävleborg, Sweden. Eligible patients will be identified  
41 from daily checks of the medical records in the stroke unit. The recruitment is  
42 planned to start in October 2017.

43  
44  
45  
46  
47  
48 20 *Inclusion and exclusion*

49  
50  
51 Patients, aged  $\geq 18$  years, with a validated diagnosis of ischemic cryptogenic stroke  
52 are eligible for the study. Cryptogenic stroke is defined as cerebral ischemia of  
53 unknown etiology i.e. not attributable to a source of cardiac embolism, large artery  
54  
55  
56  
57  
58  
59

1  
2  
3 atherosclerosis, or small artery disease despite a standard vascular, cardiac, and  
4 serologic evaluation.<sup>27</sup> For screening with chest and thumb-ECG, exclusion criteria  
5 are as follows: previously known atrial arrhythmia with an indication for  
6 anticoagulation, implantable defibrillator, pacemaker or insertable cardiac monitor,  
7  
8 pregnancy, permanent indication for anticoagulation (including low-molecular weight  
9 heparin) due to atrial arrhythmia, mechanical heart valve, deep vein thrombosis, or  
10 pulmonary embolism. Patients with a life expectancy  $\leq 6$  months (e.g. severe heart  
11 failure New York Heart Association [NYHA] functional class IV or malignancy) are  
12 likewise excluded.  
13  
14  
15  
16  
17  
18  
19  
20  
21  
22

### 23 *Variables*

24  
25 Atrial arrhythmia is defined as AF, atrial flutter, or ectopic atrial tachycardia with a  
26 duration of at least 30 seconds. Patients characteristics are age, sex, date of current  
27 ischemic stroke, previous stroke, known AF, medication (warfarin, NOAC, antiplatelet  
28 therapy), heart failure, hypertension, diabetes mellitus, vascular disease (peripheral  
29 vascular disease, aortic plaque, coronary artery disease), National Institutes of  
30 Health Stroke Scale (NIHSS), 12-lead ECG, and when applicable imaging from  
31 carotid-Doppler, computerized tomography, echocardiography, or transesophageal  
32 echocardiography, as well as coagulation laboratory examination.  
33  
34  
35  
36  
37  
38  
39  
40  
41  
42  
43

### 44 *Outcome measurements*

45  
46 Outcome measurements are arrhythmias recorded by chest and thumb-ECG  
47 obtained during scheduled twice-daily recordings or by patient-activated recordings.  
48  
49

50  
51 Each episode will be classified as AF, atrial flutter, ectopic atrial tachycardia,  
52 ventricular tachycardia, premature ventricular complex, or supraventricular ventricular  
53 complex. The date and time of each episode will be recorded.  
54  
55  
56  
57  
58  
59  
60

### *Research questions and endpoints*

The primary endpoint is 28 day cumulative incidence of atrial arrhythmia at 28 days.

### *Secondary endpoints*

- a) Prevalence of previously known atrial arrhythmia before the inclusion in the study and the number of these patients who had anticoagulant therapy.
- b) Compliance with chest and thumb-ECG at week four (number of recorded scheduled ECG tracings).
- c) Patient-reported experience with chest and thumb-ECG measured at week six (questionnaire as Supplement).
- d) HRQoL (SF-36) at week 6 and at 12 months and the association with AF and compliance with chest and thumb-ECG.
- e) Cumulative incidence of stroke after three years in patients with AF versus without AF.
- f) All-cause mortality after three years in patients with AF versus no AF.

### *Chest and thumb-ECG*

Patients will be asked to use the chest and thumb-ECG monitor device twice daily, once between the hours of 6:00 and 10:00 a.m. and again between 6:00 and 10:00 p.m.

- If the patients feel palpitations or other symptoms suggestive of arrhythmia (e.g. sudden onset of tiredness, presyncope, syncope) they are asked to record the episode with the smartphone application. Each patient is monitored for four consecutive weeks, after which the device is returned by mail to the investigators.

1  
2  
3 Each recording is stored in a web-based application that is accessible to the  
4  
5 investigators. The investigators daily check all recordings. In the case of an AF-  
6  
7 episode, we contact the patient (or relative/health care provider) as soon as possible,  
8  
9 typically the same day. The reason for this is that they require anticoagulation and  
10  
11 they typically need prompt protection (time is recorded). In the case of an AF-  
12  
13 episode, two investigators, of whom one is an experienced cardiologist within the  
14  
15 field of arrhythmia, interpret the recording.

### 16 17 18 *Power analysis*

19  
20  
21 A power analysis<sup>28</sup> based on previous research findings and estimation of outcome to  
22  
23 10 2.4%, 95% confidence interval, width of confidence interval 5%, standard deviation  
24  
25 12% results in a sample size of 89. There is likely to be drop-out of patients who are  
26  
27 unable or unwilling to meet the monitoring requirements; thus, an estimated 120  
28  
29 patients should be included in order to have 100 patients complete the chest and  
30  
31 thumb-ECG evaluation.

### 32 33 34 35 15 *Statistics*

36  
37  
38 Descriptive data will be reported as frequencies, percentages, means, and  
39  
40 percentiles. Continuous variables are summarized as means, standard deviations,  
41  
42 and percentiles, and *t*-tests for group comparisons, while chi-squared test is used for  
43  
44 categorical variables. Kaplan-Meier estimates are used to describe time to event  
45  
46 20 analysis, and cumulative incidence at 1, 2, 3, and 4 weeks will be reported. Statistical  
47  
48 significance is defined as a two-sided *p*-value of <0.05. The data will be stored in  
49  
50 Excel 2010 (Microsoft Corporation, Redmond, WA) and imported into SPSS version  
51  
52 22 (IBM, Armonk, NY) for analyses.

### 53 54 55 *Ethics and dissemination*

1  
2  
3 The Regional Ethical Committee in Uppsala approved the study the 20th of  
4  
5 September 2017 (protocol number 2017/321). The study protocol, including variables  
6  
7 and prespecified research questions, were registered at Clinical Trial Registration  
8  
9 NCT03301662 and approved 3rd of October 2017. The documentaton of research  
10  
11 data and management of the study follow the Guideline for Good Clinical Practice.<sup>29</sup>  
12  
13 Each patient is informed about the study by a physician and nurse and included after  
14  
15 written consent. After the study is completed, the database will be closed and  
16  
17 followed by statistical analyses, interpretation of results, and dissemination to  
18  
19 scientific journals.  
20  
21

## 22 23 10 **DISCUSSION**

24  
25 Since anticoagulation therapy has been proven effective in preventing ischemic  
26  
27 stroke in patients with AF, reliable AF detection following cryptogenic stroke is  
28  
29 crucial.<sup>6</sup> Hence, prolonged ECG monitoring is reasonable, especially in patients at  
30  
31 high risk of embolization. Ischemic stroke risk stratification and the decision to  
32  
33 prescribe anticoagulants is based on CHA2DS2-VASc scores; a prior history of  
34  
35 stroke counts for two points, which suffices as a rationale for anticoagulation.<sup>6</sup> The  
36  
37 vast majority of stroke patients typically have multiple risk factors, and stroke risk  
38  
39 increases with more risk factors.<sup>30</sup> ESC guidelines already allow for prolonged  
40  
41 monitoring of these patients: "In stroke patients, additional ECG monitoring by long-  
42  
43 term noninvasive or implanted loop recorders should be considered to document  
44  
45 20 silent atrial fibrillation" (Class IIa recommendation, level of evidence B).<sup>6</sup> However,  
46  
47 since the CRYSTAL-AF trial<sup>13</sup>, current practice in Sweden remains unchanged with  
48  
49 invasive monitoring rarely used for AF detection in stroke patients and still not  
50  
51 endorsed by national authorities.<sup>31</sup> The noninvasive thumb-ECG has been advocated  
52  
53  
54  
55  
56 25 in that it provides an alternative and advantageous cost-benefit profile in mass

1  
2  
3 screening.<sup>32</sup> Stroke patients have a higher risk for recurrent stroke and higher  
4 incidences of AF, so noninvasive thumb-ECG monitoring may be of even greater  
5 benefit in this population. This has yet to be analyzed, and it is our hope that our  
6 study will advance the knowledge of thumb-ECG in this population particularly with  
7 regard to healthcare economics.  
8  
9  
10  
11  
12  
13

14 The use of the thumb-ECG has been studied in a Swedish setting for stroke patients,  
15 but the study was retrospective, with data gathered at different times after the stroke,  
16 and the monitoring method was selected based on the physician's preference, which  
17 implies bias. Our prospective study includes consecutive stroke patients without  
18 referral center bias.<sup>33</sup> This will provide a basis to estimate AF incidence over an  
19 extended period of 28 days. Continuous Holter monitoring may be associated with  
20 poor compliance, technical difficulties, and time-consuming analyses of extensive  
21 amounts of data by healthcare providers.<sup>33,34</sup> The newly developed Coala Heart  
22 Monitor<sup>TM</sup> with the proven detection algorithms from Zenicor<sup>TM</sup> using a smartphone  
23 application seem to be a promising alternative, but feasibility remains to be studied.  
24  
25  
26  
27  
28  
29  
30  
31  
32  
33  
34  
35  
36  
37  
38  
39  
40  
41  
42  
43  
44  
45  
46  
47  
48  
49  
50  
51  
52  
53  
54  
55  
56  
57  
58  
59  
60

14 Although a thumb-ECG may provide an attractive method of noninvasive AF  
15 detection, there remain some controversies with regard to anticoagulation for short-  
16 term AF. The potential benefits of anticoagulation therapy for short-term AF would be  
17 challenging to study because it would require long-term follow-up, demands a large  
18 sample size, and raises ethical concerns about withholding anticoagulation from a  
19 stroke survivor. This proposed prospective observational trial of consecutive stroke  
20 patients using thumb-ECG has the prerequisites to evaluate outcome at 28 days and  
21 analyze the clinical feasibility of the Coala Heart Monitor.<sup>TM</sup>



## Acknowledgements

The authors acknowledge editing by Jo Ann LeQuang of LeQ Medical who reviewed the manuscript for American English. Ulf Tossman, David Fällman, and Philip Siberg from Coala Life for support regarding the Coala Life Monitor.<sup>TM</sup>

## 5 Author contributions

PM: idea, design, project management, and writing of the manuscript. HK: critical revision GM: idea, design, project management, critical revision.

## Funding

Region Gävleborg funded this research project and Coala Life provided free product Coala Heart Monitor<sup>TM</sup> during the study period.

## Competing interests

The authors received free product from Coala Life.

## Ethics approval

The study was approved by the Regional Ethical committee in Uppsala (Dnr 2017/321).

## REFERENCES

1. Hart RG, Pearce LA, Aguilar MI. Meta-analysis: antithrombotic therapy to prevent stroke in patients who have nonvalvular atrial fibrillation. *Ann Intern Med* 2007;146:857–67.
2. Ruff CT, Giugliano RP, Braunwald E, et al. Comparison of the efficacy and safety of new oral anticoagulants with warfarin in patients with atrial fibrillation: a meta-analysis of randomised trials. *Lancet* 2014;383:955-62.

- 1  
2  
3 3. Kernan WN, Ovbiagele B, Black HR, et al. American Heart Association Stroke  
4 Council, Council on Cardiovascular and Stroke Nursing, Council on Clinical  
5 Cardiology, and Council on Peripheral Vascular Disease. Guidelines for the  
6 prevention of stroke in patients with stroke and transient ischemic attack: a guideline  
7 for healthcare professionals from the American Heart Association/American Stroke  
8 Association. *Stroke* 2014;45:2160-236.  
9  
10  
11  
12  
13  
14  
15  
16 4. Olesen JB, Lip GY, Lindhardsen J, et al. Risks of thromboembolism and bleeding  
17 with thromboprophylaxis in patients with atrial fibrillation: A net clinical benefit  
18 analysis using a 'real world' nationwide cohort study. *Thromb Haemost*  
19 2011;106:739-49.  
20  
21  
22  
23 10 2011;106:739-49.  
24  
25  
26 5. Sjalander S, Sjalander A, Svensson PJ, et al. Atrial fibrillation patients do not  
27 benefit from acetylsalicylic acid. *Europace* 2014;16:631-8.  
28  
29  
30  
31 6. Kirchhof P, Benussi S, Kotecha D, et al. 2016 ESC Guidelines for the  
32 management of atrial fibrillation developed in collaboration with EACTS. *Eur Heart J*  
33 2016;37:2893-962.  
34  
35 15 2016;37:2893-962.  
36  
37  
38 7. Schnabel RB, Yin X, Gona P, et al. 50 year trends in atrial fibrillation prevalence,  
39 incidence, risk factors, and mortality in the Framingham Heart Study: a cohort study.  
40 *Lancet* 2015;386:154-62.  
41  
42  
43  
44  
45 8. Andersson T, Magnuson A, Bryngelsson IL, et al. All-cause mortality in 272,186  
46 patients hospitalized with incident atrial fibrillation 1995-2008: a Swedish nationwide  
47 20 patients hospitalized with incident atrial fibrillation 1995-2008: a Swedish nationwide  
48 long-term case-control study. *Eur Heart J* 2013;34:1061-7.  
49  
50  
51  
52 9. Go AS, Mozaffarian D, Roger VL, et al. American Heart Association Statistics  
53 Committee and Stroke Statistics Subcommittee. Heart disease and stroke statistics--  
54 Committee and Stroke Statistics Subcommittee. Heart disease and stroke statistics--  
55  
56  
57  
58  
59  
60

- 1  
2  
3 2014 update: a report from the American Heart Association. *Circulation*  
4  
5 2014;129:e28-e292.  
6  
7  
8 10. Kishore A, Vail A, Majid A, et al. Detection of atrial fibrillation after ischemic  
9  
10 stroke or transient ischemic attack: a systematic review and meta-analysis. *Stroke*  
11  
12 5 2014;45:520-6.  
13  
14  
15 11. Henriksson KM, Farahmand B, Asberg S, et al. Comparison of cardiovascular  
16  
17 risk factors and survival in patients with ischemic or hemorrhagic stroke. *Int J Stroke*  
18  
19 2012;7:276-81.  
20  
21  
22 12. Grond M, Jauss M, Hamann G, et al. Improved detection of silent atrial fibrillation  
23  
24 10 using 72-hour Holter ECG in patients with ischemic stroke: a prospective multicenter  
25  
26 cohort study. *Stroke* 2013;44:3357-64.  
27  
28  
29 13. Sanna T, Diener HC, Passman RS, et al. CRYSTAL AF Investigators.  
30  
31 Cryptogenic stroke and underlying atrial fibrillation. *N Engl J Med* 2014;370:2478-86.  
32  
33  
34 14. Diamantopoulos A, Sawyer LM, Lip GY, et al. Cost-effectiveness of an insertable  
35  
36 15 cardiac monitor to detect atrial fibrillation in patients with cryptogenic stroke. *Int J*  
37  
38 *Stroke*. 2016;11:302-12.  
39  
40  
41 15. Savelieva I, Camm AJ. Clinical relevance of silent atrial fibrillation: prevalence,  
42  
43 prognosis, quality of life, and management. *J Interv Card Electrophysiol* 2000;4:369-  
44  
45 82.  
46  
47  
48 16. Friberg L, Hammar N, Rosenqvist M. Stroke in paroxysmal atrial fibrillation: report  
49  
50 from the Stockholm Cohort of Atrial Fibrillation. *Eur Heart J* 2010;31:967-75.  
51  
52  
53  
54  
55  
56  
57  
58  
59  
60

- 1  
2  
3 17. Vanassche T, Lauw MN, Eikelboom JW, et al. Risk of ischaemic stroke according  
4 to pattern of atrial fibrillation: analysis of 6563 aspirin-treated patients in ACTIVE-A  
5 and AVERROES. *Eur Heart J* 2015;36:281-87.  
6  
7  
8  
9  
10 18. Healey JS, Connolly SJ, Gold MR, et al. ASSERT Investigators. Subclinical atrial  
11 fibrillation and the risk of stroke. *N Engl J Med* 2012;366:120-9.  
12 5  
13  
14  
15 19. Sposato LA, Cipriano LE, Saposnik G, et al. Diagnosis of atrial fibrillation after  
16 stroke and transient ischaemic attack: a systematic review and meta-analysis. *Lancet*  
17 *Neurol* 2015;14:377-87.  
18  
19  
20  
21  
22 20. Shafqat S, Kelly PJ, Furie KL, et al. Holter monitoring in the diagnosis of stroke  
23 mechanism. *Intern Med J* 2004;34:305-9.  
24 10  
25  
26  
27 21 Gladstone DJ, Spring M, Dorian P, et al; EMBRACE Investigators and  
28 Coordinators. Atrial fibrillation in patients with cryptogenic stroke. *N Engl J Med*  
29 2014;370:2467-77.  
30  
31  
32  
33  
34 22. Rizos T, Guntner J, Jenetzky E, et al. Continuous stroke unit electrocardiographic  
35 monitoring versus 24-hour Holter electrocardiography for detection of paroxysmal  
36 15 atrial fibrillation after stroke. *Stroke* 2012;43:2689-94.  
37  
38  
39  
40  
41 23. Orrsjö G, Cederin B, Bertholds E, et al. Screening of Paroxysmal Atrial Fibrillation  
42 after Ischemic Stroke: 48-Hour Holter Monitoring versus Prolonged Intermittent ECG  
43 Recording. *ISRN Stroke* 2014 Article ID 208195, 6 pages.  
44  
45  
46  
47  
48 20 24. Friberg L, Engdahl J, Frykman V, et al. Population screening of 75- and 76-year-  
49 old men and women for silent atrial fibrillation (STROKESTOP). *Europace*  
50 2013;15:135-40.  
51  
52  
53  
54  
55  
56  
57  
58  
59  
60

- 1  
2  
3 25. McHorney CA, Ware Jr JE, Lu JF, et al. The MOS 36-item Short-Form Health  
4 Survey (SF-36): III. Tests of data quality, scaling assumptions, and reliability across  
5 diverse patient groups. *Med Care* 1994;32:40–66.  
6  
7  
8  
9  
10 26. Sullivan M, Karlsson J, Ware Jr JE. The Swedish SF-36 Health Survey I.  
11  
12 5 Evaluation of data quality, scaling assumptions, reliability and construct validity  
13 across general populations in Sweden. *Soc Sci Med* 1995;41:1349–58.  
14  
15  
16  
17 27. Adams HP Jr, Bendixen BH, Kappelle LJ, et al. Classification of subtype of acute  
18 ischemic stroke. Definitions for use in a multicenter clinical trial. TOAST. *Stroke*.  
19 1993;24:35-41.  
20  
21  
22  
23  
24 10 28. Hulley SB, Cummings SR, Browner WS, et al. Designing clinical research: an  
25 epidemiologic approach. 4th ed. Philadelphia, PA: Lippincott Williams & Wilkins;  
26 2013. Appendix 6D, page 80.  
27  
28  
29  
30  
31 29. European Medicines Agency (2002) ICH harmonised tripartite guideline E6. In:  
32 EMA, eds. Note for Guidance on Good Clinical Practice (PMP/ICH/135/95).  
33  
34  
35  
36 15 30. Gage BF, Waterman AD, Shannon W, et al. Validation of clinical classification  
37 schemes for predicting stroke: results from the National Registry of Atrial Fibrillation.  
38 *JAMA* 2001 13;285:2864-70.  
39  
40  
41  
42  
43 31. Socialstyrelsen. [www.socialstyrelsen.se/nationellariktlinjerhjartsjukvard](http://www.socialstyrelsen.se/nationellariktlinjerhjartsjukvard) Retrieved  
44 on 8th of September 2017.  
45  
46  
47  
48 20 32. Levin LÅ, Husberg M, Sobocinski PD, et al. A cost-effectiveness analysis of  
49 screening for silent atrial fibrillation after ischaemic stroke. *Europace* 2015;17:207-14.  
50  
51  
52  
53  
54  
55  
56  
57  
58  
59  
60

1  
2  
3 33. Stahrenberg R, Weber-Krüger M, J. Seegers J, et al. Enhanced detection of  
4 paroxysmal atrial fibrillation by early and prolonged continuous holter monitoring in  
5 patients with cerebral ischemia presenting in sinus rhythm. *Stroke* 2010;41:2884-8.  
6  
7

8  
9  
10 34. Seet RCS, Friedman PA, Rabinstein AA. Prolonged rhythm monitoring for the  
11  
12 5 detection of occult paroxysmal atrial fibrillation in ischemic stroke of unknown cause.  
13  
14 *Circulation* 2011;124:477-86.  
15  
16  
17  
18  
19  
20  
21  
22  
23  
24  
25  
26  
27  
28  
29  
30  
31  
32  
33  
34  
35  
36  
37  
38  
39  
40  
41  
42  
43  
44  
45  
46  
47  
48  
49  
50  
51  
52  
53  
54  
55  
56  
57  
58  
59  
60

Code   

Name: \_\_\_\_\_

Personal ID: \_\_\_\_\_ - \_\_\_\_\_

Please describe your experience of using the chest- and thumb ECG. Follow the example below to make a clear vertical line.

Exemple: **Correct**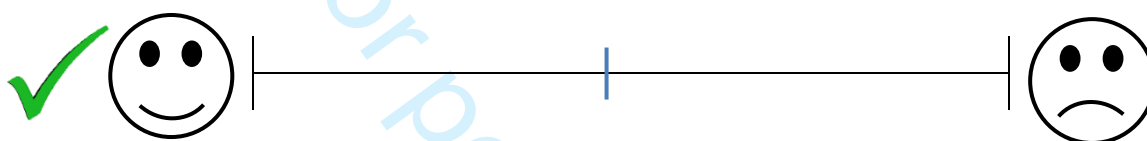Exemple: **Incorrect**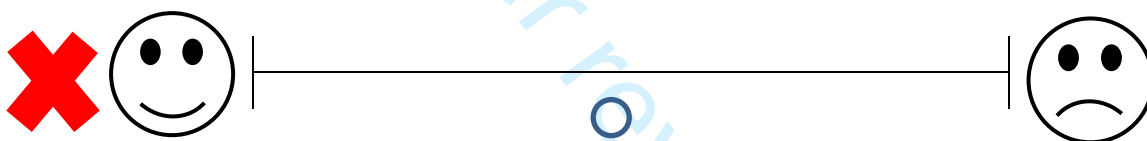

Frågor:

1. In summary, what do you think about the usage of the chest- and thumb ECG?

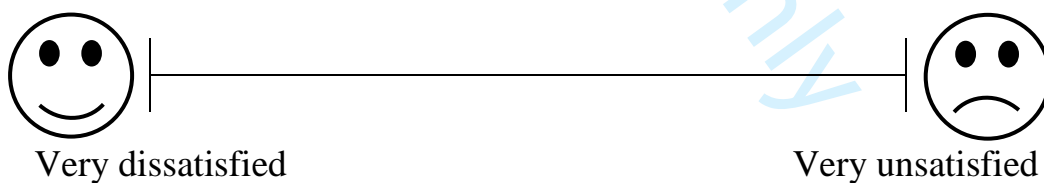

2. How was the technical feasibility of the chest- and thumb ECG?

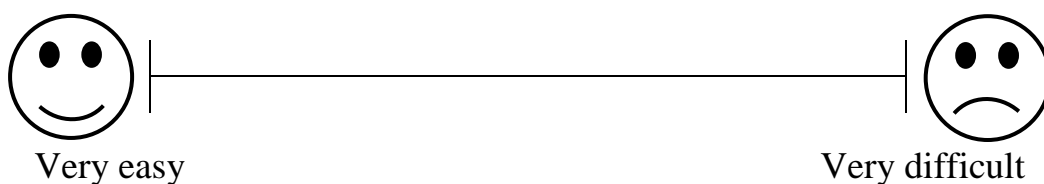

3. Did you remember to use the chest- and thumb ECG as scheduled?

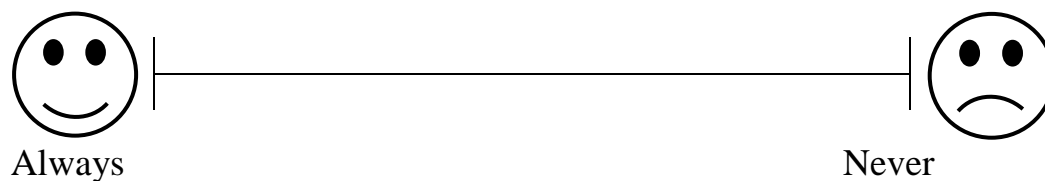

4. How was it physically to apply the chest- and thumb ECG?

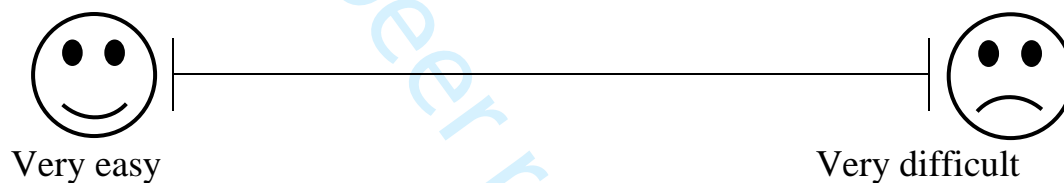

5. Did the ECG monitoring affect your feeling of security?

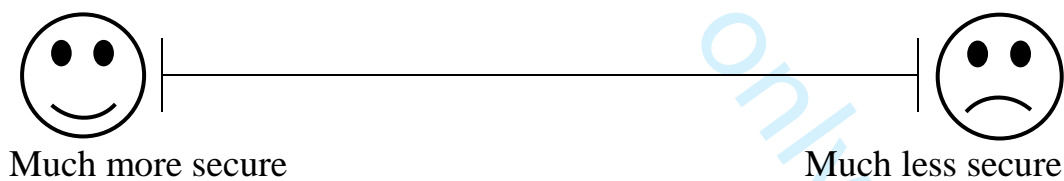

6. Did you need help from others to perform the ECG-monitoring?

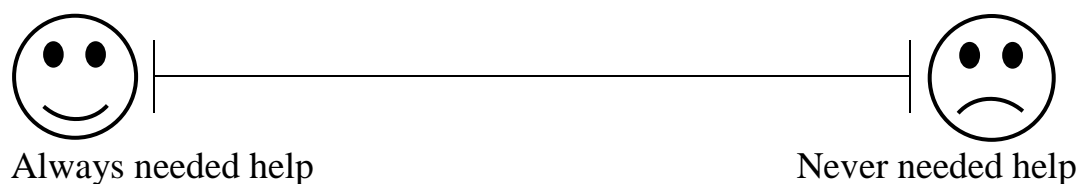



7. Would you recommend other stroke patients to use the chest- and thumb ECG monitoring?

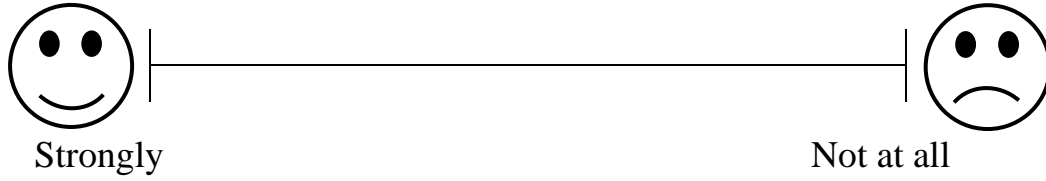

Would you like to add any comment about using the chest- and thumb ECG?  
Please use the box below.

What symptoms remain after your stroke? Please underline the alternative that describes this best.

|                                      |        |          |        |    |
|--------------------------------------|--------|----------|--------|----|
| Speech ability impairment:           | Severe | Moderate | Mildly | No |
| Impairment of ability to understand: | Severe | Moderate | Mild   | No |
| Arm weakness:                        | Severe | Moderate | Mild   | No |
| Leg weakness:                        | Severe | Moderate | Mild   | No |
| Decreased sensibility:               | Severe | Moderate | Mild   | No |
| Memory deficit:                      | Severe | Moderate | Mild   | No |
| Tiredness:                           | Severe | Moderate | Mild   | No |

Do you want add any further information, please use the box below.

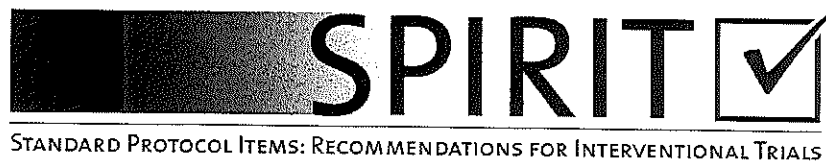

SPIRIT 2013 Checklist: Recommended items to address in a clinical trial protocol and related documents\*

| Section/item                            | Item No         | Description                                                                                                                                                                                                                                                                              |
|-----------------------------------------|-----------------|------------------------------------------------------------------------------------------------------------------------------------------------------------------------------------------------------------------------------------------------------------------------------------------|
| <b>Administrative information</b>       |                 |                                                                                                                                                                                                                                                                                          |
| page 1, line 1 Title                    | 1               | Descriptive title identifying the study design, population, interventions, and, if applicable, trial acronym                                                                                                                                                                             |
| page 3, line 1 Trial registration       | 2a              | Trial identifier and registry name. If not yet registered, name of intended registry                                                                                                                                                                                                     |
| NA                                      | 2b              | All items from the World Health Organization Trial Registration Data Set                                                                                                                                                                                                                 |
| page 3, line 1 Protocol version         | 3               | Date and version identifier                                                                                                                                                                                                                                                              |
| page 13, line 1 Funding                 | 4               | Sources and types of financial, material, and other support                                                                                                                                                                                                                              |
| Roles and responsibilities              | page 1, line 5a | Names, affiliations, and roles of protocol contributors                                                                                                                                                                                                                                  |
| page 1, line 5b                         |                 | Name and contact information for the trial sponsor                                                                                                                                                                                                                                       |
| page 13, line 5                         |                 | Role of study sponsor and funders, if any, in study design; collection, management, analysis, and interpretation of data; writing of the report; and the decision to submit the report for publication, including whether they will have ultimate authority over any of these activities |
| page 10, line 1 5d                      |                 | Composition, roles, and responsibilities of the coordinating centre, steering committee, endpoint adjudication committee, data management team, and other individuals or groups overseeing the trial, if applicable (see Item 21a for data monitoring committee)                         |
| <b>Introduction</b>                     |                 |                                                                                                                                                                                                                                                                                          |
| page 9, line 1 Background and rationale | 6a              | Description of research question and justification for undertaking the trial, including summary of relevant studies (published and unpublished) examining benefits and harms for each intervention                                                                                       |
| NA                                      | 6b              | Explanation for choice of comparators                                                                                                                                                                                                                                                    |
| page 7, line 10 Objectives              | 7               | Specific objectives or hypotheses                                                                                                                                                                                                                                                        |
| page 1, line 1 Trial design             | 8               | Description of trial design including type of trial (eg, parallel group, crossover, factorial, single group), allocation ratio, and framework (eg, superiority, equivalence, noninferiority, exploratory)                                                                                |

## Methods: Participants, interventions, and outcomes

|    |                     |                         |     |
|----|---------------------|-------------------------|-----|
| 1  |                     |                         |     |
| 2  |                     |                         |     |
| 3  |                     |                         |     |
| 4  | page 7<br>line 15   | Study setting           | 9   |
| 5  |                     |                         |     |
| 6  |                     |                         |     |
| 7  |                     |                         |     |
| 8  | page 7<br>line 20   | Eligibility criteria    | 10  |
| 9  |                     |                         |     |
| 10 |                     |                         |     |
| 11 |                     |                         |     |
| 12 |                     |                         |     |
| 13 | page 9<br>line 15   | Interventions           | 11a |
| 14 |                     |                         |     |
| 15 |                     |                         |     |
| 16 | MA                  |                         | 11b |
| 17 |                     |                         |     |
| 18 |                     |                         |     |
| 19 |                     |                         |     |
| 20 |                     |                         |     |
| 21 | MA                  | 11c                     |     |
| 22 |                     |                         |     |
| 23 |                     |                         |     |
| 24 |                     |                         |     |
| 25 |                     | 11d                     |     |
| 26 | MA                  |                         |     |
| 27 |                     |                         |     |
| 28 | page 9,<br>line 1   | Outcomes                | 12  |
| 29 |                     |                         |     |
| 30 |                     |                         |     |
| 31 |                     |                         |     |
| 32 |                     |                         |     |
| 33 |                     |                         |     |
| 34 |                     |                         |     |
| 35 |                     |                         |     |
| 36 | page 7,<br>line 15  | Participant<br>timeline | 13  |
| 37 |                     |                         |     |
| 38 |                     |                         |     |
| 39 |                     |                         |     |
| 40 | page 10,<br>line 13 | Sample size             | 14  |
| 41 |                     |                         |     |
| 42 |                     |                         |     |
| 43 |                     |                         |     |
| 44 |                     |                         |     |
| 45 | page 15<br>line 17  | Recruitment             | 15  |
| 46 |                     |                         |     |
| 47 |                     |                         |     |

## Methods: Assignment of interventions (for controlled trials)

### Allocation:

|    |    |                        |     |
|----|----|------------------------|-----|
| 51 |    |                        |     |
| 52 | MA | Sequence<br>generation | 16a |
| 53 |    |                        |     |
| 54 |    |                        |     |
| 55 |    |                        |     |
| 56 |    |                        |     |
| 57 |    |                        |     |
| 58 |    |                        |     |
| 59 |    |                        |     |
| 60 |    |                        |     |

|    |    |                                  |     |                                                                                                                                                                                                           |
|----|----|----------------------------------|-----|-----------------------------------------------------------------------------------------------------------------------------------------------------------------------------------------------------------|
| 1  |    |                                  |     |                                                                                                                                                                                                           |
| 2  | MA | Allocation concealment mechanism | 16b | Mechanism of implementing the allocation sequence (eg, central telephone; sequentially numbered, opaque, sealed envelopes), describing any steps to conceal the sequence until interventions are assigned |
| 3  |    |                                  |     |                                                                                                                                                                                                           |
| 4  |    |                                  |     |                                                                                                                                                                                                           |
| 5  |    |                                  |     |                                                                                                                                                                                                           |
| 6  |    |                                  |     |                                                                                                                                                                                                           |
| 7  | MA | Implementation                   | 16c | Who will generate the allocation sequence, who will enrol participants, and who will assign participants to interventions                                                                                 |
| 8  |    |                                  |     |                                                                                                                                                                                                           |
| 9  |    |                                  |     |                                                                                                                                                                                                           |
| 10 | MA | Blinding (masking)               | 17a | Who will be blinded after assignment to interventions (eg, trial participants, care providers, outcome assessors, data analysts), and how                                                                 |
| 11 |    |                                  |     |                                                                                                                                                                                                           |
| 12 |    |                                  |     |                                                                                                                                                                                                           |
| 13 |    |                                  |     |                                                                                                                                                                                                           |
| 14 |    |                                  |     |                                                                                                                                                                                                           |
| 15 |    |                                  | 17b | If blinded, circumstances under which unblinding is permissible, and procedure for revealing a participant's allocated intervention during the trial                                                      |
| 16 | MA |                                  |     |                                                                                                                                                                                                           |
| 17 |    |                                  |     |                                                                                                                                                                                                           |
| 18 |    |                                  |     |                                                                                                                                                                                                           |
| 19 |    |                                  |     |                                                                                                                                                                                                           |

### Methods: Data collection, management, and analysis

|    |                  |                         |     |                                                                                                                                                                                                                                                                                                                                                                                                              |
|----|------------------|-------------------------|-----|--------------------------------------------------------------------------------------------------------------------------------------------------------------------------------------------------------------------------------------------------------------------------------------------------------------------------------------------------------------------------------------------------------------|
| 20 |                  |                         |     |                                                                                                                                                                                                                                                                                                                                                                                                              |
| 21 | page 10, line 1  | Data collection methods | 18a | Plans for assessment and collection of outcome, baseline, and other trial data, including any related processes to promote data quality (eg, duplicate measurements, training of assessors) and a description of study instruments (eg, questionnaires, laboratory tests) along with their reliability and validity, if known. Reference to where data collection forms can be found, if not in the protocol |
| 22 |                  |                         |     |                                                                                                                                                                                                                                                                                                                                                                                                              |
| 23 |                  |                         |     |                                                                                                                                                                                                                                                                                                                                                                                                              |
| 24 |                  |                         |     |                                                                                                                                                                                                                                                                                                                                                                                                              |
| 25 |                  |                         |     |                                                                                                                                                                                                                                                                                                                                                                                                              |
| 26 |                  |                         |     |                                                                                                                                                                                                                                                                                                                                                                                                              |
| 27 |                  |                         |     |                                                                                                                                                                                                                                                                                                                                                                                                              |
| 28 |                  |                         |     |                                                                                                                                                                                                                                                                                                                                                                                                              |
| 29 |                  |                         |     |                                                                                                                                                                                                                                                                                                                                                                                                              |
| 30 | MA               |                         | 18b | Plans to promote participant retention and complete follow-up, including list of any outcome data to be collected for participants who discontinue or deviate from intervention protocols                                                                                                                                                                                                                    |
| 31 |                  |                         |     |                                                                                                                                                                                                                                                                                                                                                                                                              |
| 32 |                  |                         |     |                                                                                                                                                                                                                                                                                                                                                                                                              |
| 33 |                  |                         |     |                                                                                                                                                                                                                                                                                                                                                                                                              |
| 34 | page 10, line 21 | Data management         | 19  | Plans for data entry, coding, security, and storage, including any related processes to promote data quality (eg, double data entry; range checks for data values). Reference to where details of data management procedures can be found, if not in the protocol                                                                                                                                            |
| 35 |                  |                         |     |                                                                                                                                                                                                                                                                                                                                                                                                              |
| 36 | page 11, line 5  |                         |     |                                                                                                                                                                                                                                                                                                                                                                                                              |
| 37 |                  |                         |     |                                                                                                                                                                                                                                                                                                                                                                                                              |
| 38 |                  |                         |     |                                                                                                                                                                                                                                                                                                                                                                                                              |
| 39 | page 10, line 15 | Statistical methods     | 20a | Statistical methods for analysing primary and secondary outcomes. Reference to where other details of the statistical analysis plan can be found, if not in the protocol                                                                                                                                                                                                                                     |
| 40 |                  |                         |     |                                                                                                                                                                                                                                                                                                                                                                                                              |
| 41 |                  |                         |     |                                                                                                                                                                                                                                                                                                                                                                                                              |
| 42 |                  |                         |     |                                                                                                                                                                                                                                                                                                                                                                                                              |
| 43 |                  |                         |     |                                                                                                                                                                                                                                                                                                                                                                                                              |
| 44 | page 10, line 15 |                         | 20b | Methods for any additional analyses (eg, subgroup and adjusted analyses)                                                                                                                                                                                                                                                                                                                                     |
| 45 |                  |                         |     |                                                                                                                                                                                                                                                                                                                                                                                                              |
| 46 |                  |                         |     |                                                                                                                                                                                                                                                                                                                                                                                                              |
| 47 |                  |                         | 20c | Definition of analysis population relating to protocol non-adherence (eg, as randomised analysis), and any statistical methods to handle missing data (eg, multiple imputation)                                                                                                                                                                                                                              |
| 48 | MA               |                         |     |                                                                                                                                                                                                                                                                                                                                                                                                              |
| 49 |                  |                         |     |                                                                                                                                                                                                                                                                                                                                                                                                              |
| 50 |                  |                         |     |                                                                                                                                                                                                                                                                                                                                                                                                              |
| 51 |                  |                         |     |                                                                                                                                                                                                                                                                                                                                                                                                              |

### Methods: Monitoring

|    |                 |                 |     |                                                                                                                                                                                                                                                                                                                                       |
|----|-----------------|-----------------|-----|---------------------------------------------------------------------------------------------------------------------------------------------------------------------------------------------------------------------------------------------------------------------------------------------------------------------------------------|
| 52 |                 |                 |     |                                                                                                                                                                                                                                                                                                                                       |
| 53 | page 10, line 5 | Data monitoring | 21a | Composition of data monitoring committee (DMC); summary of its role and reporting structure; statement of whether it is independent from the sponsor and competing interests; and reference to where further details about its charter can be found, if not in the protocol. Alternatively, an explanation of why a DMC is not needed |
| 54 |                 |                 |     |                                                                                                                                                                                                                                                                                                                                       |
| 55 |                 |                 |     |                                                                                                                                                                                                                                                                                                                                       |
| 56 |                 |                 |     |                                                                                                                                                                                                                                                                                                                                       |
| 57 |                 |                 |     |                                                                                                                                                                                                                                                                                                                                       |
| 58 |                 |                 |     |                                                                                                                                                                                                                                                                                                                                       |
| 59 |                 |                 |     |                                                                                                                                                                                                                                                                                                                                       |
| 60 |                 |                 |     |                                                                                                                                                                                                                                                                                                                                       |

1  
2  
3  
4  
5  
6  
7  
8  
9  
10  
11  
12  
13  
14  
15  
16  
17  
18  
19  
20  
21  
22  
23  
24  
25  
26  
27  
28  
29  
30  
31  
32  
33  
34  
35  
36  
37  
38  
39  
40  
41  
42  
43  
44  
45  
46  
47  
48  
49  
50  
51  
52  
53  
54  
55  
56  
57  
58  
59  
60

MA

21b Description of any interim analyses and stopping guidelines, including who will have access to these interim results and make the final decision to terminate the trial

MA

Harms

22 Plans for collecting, assessing, reporting, and managing solicited and spontaneously reported adverse events and other unintended effects of trial interventions or trial conduct

MA

Auditing

23 Frequency and procedures for auditing trial conduct, if any, and whether the process will be independent from investigators and the sponsor

**Ethics and dissemination**

page 11, line 2

Research ethics approval

24 Plans for seeking research ethics committee/institutional review board (REC/IRB) approval

MA

Protocol amendments

25 Plans for communicating important protocol modifications (eg, changes to eligibility criteria, outcomes, analyses) to relevant parties (eg, investigators, REC/IRBs, trial participants, trial registries, journals, regulators)

page 11, line 7

Consent or assent

26a Who will obtain informed consent or assent from potential trial participants or authorised surrogates, and how (see Item 32)

MA

26b Additional consent provisions for collection and use of participant data and biological specimens in ancillary studies, if applicable

page 11, line 5

Confidentiality

27 How personal information about potential and enrolled participants will be collected, shared, and maintained in order to protect confidentiality before, during, and after the trial

page 13, line 12

Declaration of interests

28 Financial and other competing interests for principal investigators for the overall trial and each study site

page 10, line 11

Access to data

29 Statement of who will have access to the final trial dataset, and disclosure of contractual agreements that limit such access for investigators

MA

Ancillary and post-trial care

30 Provisions, if any, for ancillary and post-trial care, and for compensation to those who suffer harm from trial participation

page 11, line 7

Dissemination policy

31a Plans for investigators and sponsor to communicate trial results to participants, healthcare professionals, the public, and other relevant groups (eg, via publication, reporting in results databases, or other data sharing arrangements), including any publication restrictions

MA

31b Authorship eligibility guidelines and any intended use of professional writers

MA

31c Plans, if any, for granting public access to the full protocol, participant-level dataset, and statistical code

**Appendices**

|    |                            |    |                                                                                                                                                                                                |
|----|----------------------------|----|------------------------------------------------------------------------------------------------------------------------------------------------------------------------------------------------|
| MA | Informed consent materials | 32 | Model consent form and other related documentation given to participants and authorised surrogates                                                                                             |
| MA | Biological specimens       | 33 | Plans for collection, laboratory evaluation, and storage of biological specimens for genetic or molecular analysis in the current trial and for future use in ancillary studies, if applicable |

---

\*It is strongly recommended that this checklist be read in conjunction with the SPIRIT 2013 Explanation & Elaboration for important clarification on the items. Amendments to the protocol should be tracked and dated. The SPIRIT checklist is copyrighted by the SPIRIT Group under the Creative Commons "Attribution-NonCommercial-NoDerivs 3.0 Unported" license.

# BMJ Open

## A protocol for a prospective observational study using chest and thumb- ECG: Transient Electrocardiogram Assessment in Stroke Evaluation (TEASE) in Sweden.

|                                 |                                                                                                                                                                                                                                                                                                                                                                                                                           |
|---------------------------------|---------------------------------------------------------------------------------------------------------------------------------------------------------------------------------------------------------------------------------------------------------------------------------------------------------------------------------------------------------------------------------------------------------------------------|
| Journal:                        | <i>BMJ Open</i>                                                                                                                                                                                                                                                                                                                                                                                                           |
| Manuscript ID                   | bmjopen-2017-019933.R2                                                                                                                                                                                                                                                                                                                                                                                                    |
| Article Type:                   | Protocol                                                                                                                                                                                                                                                                                                                                                                                                                  |
| Date Submitted by the Author:   | 19-Dec-2017                                                                                                                                                                                                                                                                                                                                                                                                               |
| Complete List of Authors:       | Magnusson, Peter; Karolinska Institutet, Cardiology Research Unit, Department of Medicine; Uppsala University, 2. Centre for Research and Development, Uppsala University/Region Gävleborg<br>Koyi, Hirsh; Uppsala University, Centre for Research and Development, Uppsala University/Region Gävleborg<br>Mattsson, Gustav; Uppsala University, Centre for Research and Development, Uppsala University/Region Gävleborg |
| <b>Primary Subject Heading</b>: | Cardiovascular medicine                                                                                                                                                                                                                                                                                                                                                                                                   |
| Secondary Subject Heading:      | Diagnostics                                                                                                                                                                                                                                                                                                                                                                                                               |
| Keywords:                       | Adult cardiology < CARDIOLOGY, Pacing & electrophysiology < CARDIOLOGY, Cardiology < INTERNAL MEDICINE, Stroke medicine < INTERNAL MEDICINE                                                                                                                                                                                                                                                                               |
|                                 |                                                                                                                                                                                                                                                                                                                                                                                                                           |

SCHOLARONE™  
Manuscripts

only



1  
2  
3 **A protocol for a prospective observational study using chest and thumb- ECG:**  
4  
5 **Transient Electrocardiogram Assessment in Stroke Evaluation (TEASE) in**  
6  
7 **Sweden.**  
8

9 Peter Magnusson<sup>1,2</sup> Hirsh Koyi<sup>2</sup> Gustav Mattsson<sup>2</sup>

- 10  
11  
12 5 1. Cardiology Research Unit, Department of Medicine, Karolinska Institutet, Stockholm, SE-171 76,  
13 SWEDEN  
14  
15 2. Centre for Research and Development, Uppsala University/Region Gävleborg, Gävle, SE-801 87,  
16 SWEDEN  
17  
18  
19  
20

21 10

22  
23 **Correspondence to:**

24 Peter Magnusson

25 Cardiology Research Unit, Department of Medicine

26 Karolinska Institutet

27  
28  
29  
30 15 Karolinska University Hospital/Solna

31 SE-171 76 Stockholm, SWEDEN

32  
33 Phone: +46(0)705 089407

34 Fax: +46(0)26 154255

35  
36 E-mail: peter.magnusson@regiongavleborg.se  
37  
38

39 20

40  
41  
42  
43  
44  
45  
46  
47  
48 25  
49  
50  
51  
52  
53  
54  
55  
56  
57  
58  
59  
60

## ABSTRACT

**Introduction:** Atrial fibrillation (AF) causes ischemic stroke and based on risk factor evaluation warrants anticoagulation therapy. In stroke survivors, AF is typically detected with short-term ECG monitoring in the stroke unit. Prolonged continuous ECG monitoring requires substantial resources while insertable cardiac monitors are invasive and costly. Chest and thumb-ECG could provide an alternative for AF detection post-stroke.

The primary objective of our study is to assess the incidence of newly diagnosed AF during 28 days of chest and thumb-ECG monitoring in cryptogenic stroke. Secondary objectives are to assesses health-related quality of life (HRQoL) using SF-36 and the feasibility of the Coala Heart Monitor™ in stroke patients.

**Methods:** Stroke survivors in Region Gävleborg, Sweden, will be eligible for the study from October 2017. Patients with a history of ischemic stroke without documented AF before or during ECG evaluation in the stroke unit will be evaluated by the chest and thumb-ECG system Coala Heart Monitor.™ The monitoring system is connected to a smartphone application which allows for remote monitoring and prompt advice on clinical management. Over a period of 28 days, patients will be monitored twice daily and may activate the ECG recording at symptoms. Upon completion, the system is returned by mail. This system offers a possibility to evaluate the presence of AF post-stroke, but the feasibility of this system in patients who recently suffered from a stroke is unknown. In addition HRQoL using SF-36 in comparison to Swedish population norms will be assessed. The feasibility of the Coala Heart Monitor™ will be assessed by a self-developed questionnaire.

**Ethics and dissemination:** The study was approved by The Regional Ethical Committee in Uppsala (2017/321) and registered at Clinical Trial Registration NCT03301662. The database will be closed after the last follow-up, followed by statistical analyses, interpretation of results, and dissemination to a scientific journal.

5

For peer review only

## Strengths and limitations of this study

- Chest and thumb-ECG evaluation applied after 24-hour ECG Holter at the stroke unit after confirmation of ischemic stroke.
- Usage of a smartphone application for storage of chest and thumb-ECG which may improve compliance and facilitate fast evaluation by the health-care provider in order to prescribe an anticoagulant when indicated.
- Prospective design including consecutive patients which eliminate both selection and tertiary center bias.
- Management of short (30 seconds) AF episodes, detected by non 12-lead ECG, lack evidence from randomized controlled trials with regard to benefit of anticoagulation.
- The small sample size (n=100) may imply type-II errors in subgroup analyses.

**Keywords:** atrial fibrillation, cryptogenic stroke, ECG screening, health-related quality of life, SF-36, stroke, thumb-ECG

## INTRODUCTION

Atrial fibrillation (AF) causes stroke and systemic embolization, but these devastating events can be prevented by anticoagulant therapy.<sup>1</sup> A non-vitamin K antagonist oral anticoagulant (NOAC) is the preferred choice and effectively reduce the risk of stroke and mortality.<sup>2</sup> A meta-analysis of the pivotal NOAC trials showed a 19% reduction of stroke/systemic embolism and 10% lower mortality compared to warfarin.<sup>2</sup> If AF is not diagnosed, antiplatelet medication is current practice following a stroke.<sup>3</sup> According to the European Society of Cardiology (ESC), antiplatelet monotherapy should not be considered in the presence of AF, regardless of the stroke risk.<sup>4-6</sup> Stroke is a leading cause of disability and death and is the incidence is increasing due to ageing populations and the growing prevalence risk factors such as diabetes and hypertension.<sup>7-9</sup> At least 20-30% of patients with ischemic stroke have a documented episode of AF before, during, or after the event, but in a quarter of these patients, the stroke is cryptogenic, meaning that no etiologic factor can be determined.<sup>10-12</sup> However, the proportion of cryptogenic stroke from studies varies due to heterogeneity of cohorts and evaluation tools.

Possibilities for AF detection include monitoring in the hospital ward, repeated electrocardiograms (ECG), Holter monitoring, external event or loop recorders, and long-term outpatient monitoring. Insertable cardiac monitors in cryptogenic stroke yields an AF diagnosis in 8.9% at 6 months and 12.4% at 12 months, but this strategy has not been endorsed in current practice as it requires considerable resources and imply high costs, even though cost-effectiveness has been suggested.<sup>6,13,14</sup> Episodes of AF may be silent, thus not recognized or reported by the patient, but are nevertheless associated with the same risk of embolization.<sup>15-17</sup> In patients with either dual-chamber pacemakers or implantable defibrillators and with

1  
2  
3 no documented history of AF, 10.1% had episodes of high-rate atrial tachycardia and  
4  
5 this was also associated with an increased risk of stroke.<sup>18</sup>  
6

7  
8 Sequential stratified ECG monitoring detected AF in 24% of stroke patients in one  
9  
10 study.<sup>10</sup> The diagnostic yield was 11.5% in a pooled analysis, but this yield varies  
11  
12 5 with such study factors as timing, length of registration, and the monitoring tool.<sup>19</sup> In  
13  
14 unselected stroke patients, 24-hour monitoring found AF in only 2.4%.<sup>20</sup> This may  
15  
16 vary substantially with the recording technique; in a recent study, AF (defined as  $\geq 30$   
17  
18 seconds in duration) was detected in 16.1% of patients monitored by an 30-day  
19  
20 event-triggered recorder compared to 3.2% of patients monitored by 24-hour ECG.<sup>21</sup>  
21  
22

23 10 A large multicenter study of stroke patients on Holter monitoring reported new  
24  
25 diagnoses of AF in 2.6% of patients at 24 hours and 4.3% at 72 hours.<sup>12</sup> In another  
26  
27 study, AF was detected in 8.3% of stroke patients monitored by continuous ECG for  
28  
29 a median of 89 hours in the stroke unit; ECG monitoring was superior to 24-hour  
30  
31 Holter monitoring in detecting AF.<sup>22</sup>  
32  
33

34 15 Thus, while ECG monitoring for an extended period is important for stroke survivors  
35  
36 post-discharge Holter monitoring is impractical, ECG data storage is limited, and data  
37  
38 interpretation requires considerable resources. Therefore, the thumb-ECG offers  
39  
40 advantages in that it monitors conveniently (typically twice daily) and can be  
41  
42 activated to capture symptomatic episodes. For example, AF was detected in 11.4%  
43  
44 20 of post-stroke patients monitored by thumb-ECG over 21 days versus 2.8% in those  
45  
46 continuously monitored for 48 hours.<sup>23</sup>  
47  
48  
49

50 The thumb-ECG monitor system Zenicor<sup>TM</sup> (Zenicor Medical Systems AB, Stockholm,  
51  
52 Sweden) has been shown to diagnose previously unknown AF in 3.0% of the general  
53  
54 population in Sweden aged 75 years.<sup>24</sup> The Zenicor<sup>TM</sup> system has been developed  
55  
56  
57  
58  
59  
60

1  
2  
3 and integrated into the chest and thumb-ECG Coala Heart Monitor™ (Coala Life AB,  
4 Stockholm, Sweden). The monitoring system utilizes a smartphone application which  
5 allows for remote monitoring by a clinician. This system may help to evaluate the  
6 presence of AF post-stroke. However, feasibility of this system in patients who  
7 recently suffered a stroke has not been studied. In addition health-related quality of  
8 life (HRQoL) using SF-36 in comparison to Swedish population norms will be  
9 assessed.<sup>25,26</sup> The feasibility of the Coala Heart Monitor™ will be assessed by a self-  
10 developed questionnaire (see Supplement).

## 20 OBJECTIVES

21  
22  
23 10 The primary objective is to assess the incidence of newly diagnosed AF during 28  
24 days of chest and thumb-ECG in cryptogenic stroke patients.

25  
26  
27  
28 The secondary objectives are to assesses HRQoL using SF-36 and the feasibility of  
29 the Coala Heart Monitor™ in patients with stroke. In addition, stroke patients not  
30 eligible for the chest and thumb-ECG monitoring, will be analyzed with regard to  
31 prevalence of previous atrial arrhythmia (including whether they were  
32 anticoagulated), cumulative incidence of stroke after three years, and all-cause  
33 mortality after three years in patients with AF versus no AF.  
34  
35 15

## 42 METHODS

### 45 *Setting and selection*

46  
47 20 Patients with a clinically confirmed diagnosis of ischemic stroke will be recruited from  
48 the catchment area of Region Gävleborg, Sweden. Eligible patients will be identified  
49 from daily checks of the medical records in the stroke unit. The recruitment is  
50 planned to start in October 2017.  
51  
52  
53  
54  
55  
56  
57  
58  
59  
60

### *Inclusion and exclusion*

Patients, aged  $\geq 18$  years, with a validated diagnosis of ischemic cryptogenic stroke are eligible for the study. Cryptogenic stroke is defined as cerebral ischemia of unknown etiology i.e. not attributable to a source of cardiac embolism, large artery atherosclerosis, or small artery disease despite a standard vascular, cardiac, and serologic evaluation.<sup>27</sup> For screening with chest and thumb-ECG, exclusion criteria are as follows: previously known atrial arrhythmia with an indication for anticoagulation, implantable defibrillator, pacemaker or insertable cardiac monitor, pregnancy, permanent indication for anticoagulation (including low-molecular weight heparin) due to atrial arrhythmia, mechanical heart valve, deep vein thrombosis, or pulmonary embolism. Patients with a life expectancy  $\leq 6$  months (e.g. severe heart failure New York Heart Association [NYHA] functional class IV or malignancy) are likewise excluded.

### *Variables*

Atrial arrhythmia is defined as AF, atrial flutter, or ectopic atrial tachycardia with a duration of at least 30 seconds. Patients characteristics are age, sex, date of current ischemic stroke, previous stroke, known AF, medication (warfarin, NOAC, antiplatelet therapy), heart failure, hypertension, diabetes mellitus, vascular disease (peripheral vascular disease, aortic plaque, coronary artery disease), National Institutes of Health Stroke Scale (NIHSS), 12-lead ECG, and when applicable imaging from carotid-Doppler, computerized tomography, echocardiography, or transesophageal echocardiography, as well as coagulation laboratory examination.

### *Outcome measurements*



1  
2  
3 Outcome measurements are arrhythmias recorded by chest and thumb-ECG  
4  
5 obtained during scheduled twice-daily recordings or by patient-activated recordings.  
6

7  
8 Each episode will be classified as AF, atrial flutter, ectopic atrial tachycardia,  
9  
10 ventricular tachycardia, premature ventricular complex, or supraventricular ventricular  
11  
12 5 complex. The date and time of each episode will be recorded.  
13

### 14 *Research questions and endpoints*

15  
16  
17 The primary endpoint is 28 day cumulative incidence of atrial arrhythmia at 28 days.  
18  
19

### 20 *Secondary endpoints*

21  
22  
23 a) Prevalence of previously known atrial arrhythmia before the inclusion in the study  
24  
25 10 and the number of these patients who had anticoagulant therapy.  
26

27  
28 b) Compliance with chest and thumb-ECG at week four (number of recorded  
29  
30 scheduled ECG tracings).  
31

32  
33 c) Patient-reported experience with chest and thumb-ECG measured at week six  
34  
35 (questionnaire as Supplement).  
36

37  
38 15 d) HRQoL (SF-36) at week 6 and at 12 months and the association with AF and  
39  
40 compliance with chest and thumb-ECG.  
41

42  
43 e) Cumulative incidence of stroke after three years in patients with AF versus without  
44  
45 AF.  
46

47  
48 f) All-cause mortality after three years in patients with AF versus no AF.  
49

### 50 20 *Chest and thumb-ECG*

51  
52  
53 Patients will be asked to use the chest and thumb-ECG monitor device twice daily,  
54  
55 once between the hours of 6:00 and 10:00 a.m. and again between 6:00 and 10:00  
56  
57  
58  
59  
60

1  
2  
3 p.m. The monitoring will start within a few days when the diagnosis of stroke has  
4  
5 been confirmed and standard evaluation is complete, typically 1-5 days.  
6

7  
8 If the patients feel palpitations or other symptoms suggestive of arrhythmia (e.g.

9  
10 sudden onset of tiredness, presyncope, syncope) they are asked to record the

11  
12 5 episode with the smartphone application. Each patient is monitored for four

13  
14 consecutive weeks, after which the device is returned by mail to the investigators.  
15

16  
17 Each recording is stored in a web-based application that is accessible to the

18  
19 investigators. The investigators daily check all recordings. In the case of an AF-

20  
21 episode, we contact the patient (or relative/health care provider) as soon as possible,  
22

23  
24 10 typically the same day. The reason for this is that they require anticoagulation and

25  
26 they typically need prompt protection (time is recorded). In the case of an AF-

27  
28 episode, two investigators, of whom one is an experienced cardiologist within the

29  
30 field of arrhythmia, interpret the recording.  
31

### 32 33 *Power analysis*

34  
35 15 A power analysis<sup>28</sup> based on previous research findings and estimation of outcome to

36  
37 2.4%, 95% confidence interval, width of confidence interval 5%, standard deviation

38  
39 12% results in a sample size of 89. There is likely to be drop-out of patients who are

40  
41 unable or unwilling to meet the monitoring requirements; thus, an estimated 120

42  
43 patients should be included in order to have 100 patients complete the chest and

44  
45 20 thumb-ECG evaluation.  
46

### 47 48 49 *Statistics*

50  
51 Descriptive data will be reported as frequencies, percentages, means, and

52  
53 percentiles. Continuous variables are summarized as means, standard deviations,

54  
55 and percentiles, and *t*-tests for group comparisons, while chi-squared test is used for  
56  
57  
58  
59  
60

1  
2  
3 categorical variables. Kaplan-Meier estimates are used to describe time to event  
4  
5 analysis, and cumulative incidence at 1, 2, 3, and 4 weeks will be reported. Statistical  
6  
7 significance is defined as a two-sided  $p$ -value of  $<0.05$ . The data will be stored in  
8  
9 Excel 2010 (Microsoft Corporation, Redmond, WA) and imported into SPSS version  
10  
11 5 22 (IBM, Armonk, NY) for analyses.

### 14 *Ethics and dissemination*

16  
17 The Regional Ethical Committee in Uppsala approved the study the 20th of  
18  
19 September 2017 (protocol number 2017/321). The study protocol, including variables  
20  
21 and prespecified research questions, were registered at Clinical Trial Registration  
22  
23 10 NCT03301662 and approved 3rd of October 2017. The documentaton of research  
24  
25 data and management of the study follow the Guideline for Good Clinical Practice.<sup>29</sup>  
26  
27 Each patient is informed about the study by a physician and nurse and included after  
28  
29 written consent. After the study is completed, the database will be closed and  
30  
31 followed by statistical analyses, interpretation of results, and dissemination to  
32  
33  
34 15 scientific journals.

### 37 **DISCUSSION**

38  
39  
40 Since anticoagulation therapy has been proven effective in preventing ischemic  
41  
42 stroke in patients with AF, reliable AF detection following cryptogenic stroke is  
43  
44 crucial.<sup>6</sup> Hence, prolonged ECG monitoring is reasonable, especially in patients at  
45  
46 20 high risk of embolization. Ischemic stroke risk stratification and the decision to  
47  
48 prescribe anticoagulants is based on CHA2DS2-VASc scores; a prior history of  
49  
50 stroke counts for two points, which suffices as a rationale for anticoagulation.<sup>6</sup> The  
51  
52 vast majority of stroke patients typically have multiple risk factors, and stroke risk  
53  
54 increases with more risk factors.<sup>30</sup> ESC guidelines already allow for prolonged  
55  
56  
57  
58  
59  
60

1  
2  
3 monitoring of these patients: “In stroke patients, additional ECG monitoring by long-  
4 term noninvasive or implanted loop recorders should be considered to document  
5 silent atrial fibrillation” (Class IIa recommendation, level of evidence B).<sup>6</sup> However,  
6  
7 since the CRYSTAL-AF trial<sup>13</sup>, current practice in Sweden remains unchanged with  
8  
9  
10  
11  
12 5 invasive monitoring rarely used for AF detection in stroke patients and still not  
13  
14 endorsed by national authorities.<sup>31</sup> The noninvasive thumb-ECG has been advocated  
15  
16 in that it provides an alternative and advantageous cost-benefit profile in mass  
17  
18 screening.<sup>32</sup> Stroke patients have a higher risk for recurrent stroke and higher  
19  
20 incidences of AF, so noninvasive thumb-ECG monitoring may be of even greater  
21  
22 10 benefit in this population. This has yet to be analyzed, and it is our hope that our  
23  
24 study will advance the knowledge of thumb-ECG in this population particularly with  
25  
26 regard to healthcare economics.  
27

28  
29 The use of the thumb-ECG has been studied in a Swedish setting for stroke patients,  
30  
31 but the study was retrospective, with data gathered at different times after the stroke,  
32  
33 15 and the monitoring method was selected based on the physician’s preference, which  
34  
35 implies bias. Our prospective study includes consecutive stroke patients without  
36  
37 referral center bias.<sup>33</sup> This will provide a basis to estimate AF incidence over an  
38  
39 extended period of 28 days. Continuous Holter monitoring may be associated with  
40  
41 poor compliance, technical difficulties, and time-consuming analyses of extensive  
42  
43  
44 20 amounts of data by healthcare providers.<sup>33,34</sup> The newly developed Coala Heart  
45  
46 Monitor<sup>TM</sup> with the proven detection algorithms from Zenicor<sup>TM</sup> using a smartphone  
47  
48 application seem to be a promising alternative, but feasibility remains to be studied.  
49  
50 Therefore we added a questionnaire to address feasibility issues.  
51

52  
53 Although a thumb-ECG may provide an attractive method of noninvasive AF  
54  
55 25 detection, there remain some controversies with regard to anticoagulation for short-  
56  
57  
58  
59  
60

1  
2  
3 term AF. The potential benefits of anticoagulation therapy for short-term AF would be  
4  
5 challenging to study because it would require long-term follow-up, demands a large  
6  
7 sample size, and raises ethical concerns about withholding anticoagulation from a  
8  
9 stroke survivor. This proposed prospective observational trial of consecutive stroke  
10  
11 5 patients using thumb-ECG has the prerequisites to evaluate outcome at 28 days and  
12  
13 analyze the clinical feasibility of the Coala Heart Monitor.<sup>TM</sup>  
14  
15

### 16 **Acknowledgements**

17  
18  
19 The authors acknowledge editing by Jo Ann LeQuang of LeQ Medical who reviewed  
20  
21 the manuscript for American English. Ulf Tossman, David Fällman, and Philip Siberg  
22  
23 10 from Coala Life for support regarding the Coala Life Monitor.<sup>TM</sup>  
24  
25

### 26 **Author contributions**

27  
28  
29 PM: idea, design, project management, and writing of the manuscript. HK: critical  
30  
31 revision GM: idea, design, project management, critical revision.  
32  
33

### 34 **Funding**

35  
36  
37 15 Region Gävleborg funded this research project and Coala Life provided free product  
38  
39 Coala Heart Monitor<sup>TM</sup> during the study period.  
40  
41

### 42 **Competing interests**

43  
44  
45 The authors received free product from Coala Life.  
46  
47

### 48 **Ethics approval**

49  
50 20 The study was approved by the Regional Ethical committee in Uppsala (Dnr  
51  
52 2017/321).  
53  
54

### 55 **REFERENCES**

- 1  
2  
3 1. Hart RG, Pearce LA, Aguilar MI. Meta-analysis: antithrombotic therapy to prevent  
4 stroke in patients who have nonvalvular atrial fibrillation. *Ann Intern Med*  
5 2007;146:857–67.  
6  
7  
8
- 9  
10 2. Ruff CT, Giugliano RP, Braunwald E, et al. Comparison of the efficacy and safety  
11 of new oral anticoagulants with warfarin in patients with atrial fibrillation: a meta-  
12 5 analysis of randomised trials. *Lancet* 2014;383:955-62.  
13  
14  
15
- 16  
17 3. Kernan WN, Ovbiagele B, Black HR, et al. American Heart Association Stroke  
18 Council, Council on Cardiovascular and Stroke Nursing, Council on Clinical  
19 Cardiology, and Council on Peripheral Vascular Disease. Guidelines for the  
20 prevention of stroke in patients with stroke and transient ischemic attack: a guideline  
21 for healthcare professionals from the American Heart Association/American Stroke  
22 Association. *Stroke* 2014;45:2160-236.  
23  
24 10  
25  
26  
27  
28  
29
- 30  
31 4. Olesen JB, Lip GY, Lindhardsen J, et al. Risks of thromboembolism and bleeding  
32 with thromboprophylaxis in patients with atrial fibrillation: A net clinical benefit  
33 analysis using a 'real world' nationwide cohort study. *Thromb Haemost*  
34 15  
35 2011;106:739-49.  
36  
37  
38  
39
- 40  
41 5. Sjalander S, Sjalander A, Svensson PJ, et al. Atrial fibrillation patients do not  
42 benefit from acetylsalicylic acid. *Europace* 2014;16:631-8.  
43  
44
- 45  
46 6. Kirchhof P, Benussi S, Kotecha D, et al. 2016 ESC Guidelines for the  
47 20 management of atrial fibrillation developed in collaboration with EACTS. *Eur Heart J*  
48 2016;37:2893-962.  
49  
50
- 51  
52 7. Schnabel RB, Yin X, Gona P, et al. 50 year trends in atrial fibrillation prevalence,  
53 incidence, risk factors, and mortality in the Framingham Heart Study: a cohort study.  
54  
55  
56  
57  
58  
59  
60

- 1  
2  
3 8. Andersson T, Magnuson A, Bryngelsson IL, et al. All-cause mortality in 272,186  
4 patients hospitalized with incident atrial fibrillation 1995-2008: a Swedish nationwide  
5 long-term case-control study. *Eur Heart J* 2013;34:1061-7.  
6  
7  
8  
9  
10 9. Go AS, Mozaffarian D, Roger VL, et al. American Heart Association Statistics  
11  
12 5 Committee and Stroke Statistics Subcommittee. Heart disease and stroke statistics--  
13  
14 2014 update: a report from the American Heart Association. *Circulation*  
15  
16 2014;129:e28-e292.  
17  
18  
19 10. Kishore A, Vail A, Majid A, et al. Detection of atrial fibrillation after ischemic  
20  
21 stroke or transient ischemic attack: a systematic review and meta-analysis. *Stroke*  
22  
23 10 2014;45:520-6.  
24  
25  
26 11. Henriksson KM, Farahmand B, Asberg S, et al. Comparison of cardiovascular  
27  
28 risk factors and survival in patients with ischemic or hemorrhagic stroke. *Int J Stroke*  
29  
30 2012;7:276-81.  
31  
32  
33 12. Grond M, Jauss M, Hamann G, et al. Improved detection of silent atrial fibrillation  
34  
35 15 using 72-hour Holter ECG in patients with ischemic stroke: a prospective multicenter  
36  
37 cohort study. *Stroke* 2013;44:3357-64.  
38  
39  
40 13. Sanna T, Diener HC, Passman RS, et al. CRYSTAL AF Investigators.  
41  
42 Cryptogenic stroke and underlying atrial fibrillation. *N Engl J Med* 2014;370:2478-86.  
43  
44  
45 14. Diamantopoulos A, Sawyer LM, Lip GY, et al. Cost-effectiveness of an insertable  
46  
47 20 cardiac monitor to detect atrial fibrillation in patients with cryptogenic stroke. *Int J*  
48  
49 *Stroke*. 2016;11:302-12.  
50  
51  
52  
53  
54  
55  
56  
57  
58  
59  
60

- 1  
2  
3 15. Savelieva I, Camm AJ. Clinical relevance of silent atrial fibrillation: prevalence,  
4 prognosis, quality of life, and management. *J Interv Card Electrophysiol* 2000;4:369-  
5 82.  
6  
7  
8  
9  
10 16. Friberg L, Hammar N, Rosenqvist M. Stroke in paroxysmal atrial fibrillation: report  
11 from the Stockholm Cohort of Atrial Fibrillation. *Eur Heart J* 2010;31:967-75.  
12 5  
13  
14 17. Vanassche T, Lauw MN, Eikelboom JW, et al. Risk of ischaemic stroke according  
15 to pattern of atrial fibrillation: analysis of 6563 aspirin-treated patients in ACTIVE-A  
16 and AVERROES. *Eur Heart J* 2015;36:281-87.  
17  
18  
19  
20  
21 18. Healey JS, Connolly SJ, Gold MR, et al. ASSERT Investigators. Subclinical atrial  
22 fibrillation and the risk of stroke. *N Engl J Med* 2012;366:120-9.  
23 10  
24  
25  
26 19. Sposato LA, Cipriano LE, Saposnik G, et al. Diagnosis of atrial fibrillation after  
27 stroke and transient ischaemic attack: a systematic review and meta-analysis. *Lancet*  
28 *Neurol* 2015;14:377-87.  
29  
30  
31  
32  
33 20. Shafqat S, Kelly PJ, Furie KL, et al. Holter monitoring in the diagnosis of stroke  
34 mechanism. *Intern Med J* 2004;34:305-9.  
35 15  
36  
37  
38 21 Gladstone DJ, Spring M, Dorian P, et al; EMBRACE Investigators and  
39 Coordinators. Atrial fibrillation in patients with cryptogenic stroke. *N Engl J Med*  
40 2014;370:2467-77.  
41  
42  
43  
44  
45 22. Rizos T, Guntner J, Jenetzky E, et al. Continuous stroke unit electrocardiographic  
46 monitoring versus 24-hour Holter electrocardiography for detection of paroxysmal  
47 20  
48 atrial fibrillation after stroke. *Stroke* 2012;43:2689-94.  
49  
50  
51  
52  
53  
54  
55  
56  
57  
58  
59  
60



- 1  
2  
3 23. Orrsjö G, Cederin B, Bertholds E, et al. Screening of Paroxysmal Atrial Fibrillation  
4 after Ischemic Stroke: 48-Hour Holter Monitoring versus Prolonged Intermittent ECG  
5 Recording. *ISRN Stroke* 2014 Article ID 208195, 6 pages.  
6  
7  
8  
9  
10 24. Friberg L, Engdahl J, Frykman V, et al. Population screening of 75- and 76-year-  
11 old men and women for silent atrial fibrillation (STROKESTOP). *Europace*  
5 2013;15:135-40.  
13  
14  
15  
16  
17 25. McHorney CA, Ware Jr JE, Lu JF, et al. The MOS 36-item Short-Form Health  
18 Survey (SF-36): III. Tests of data quality, scaling assumptions, and reliability across  
19 diverse patient groups. *Med Care* 1994;32:40–66.  
20  
21  
22  
23  
24 10 26. Sullivan M, Karlsson J, Ware Jr JE. The Swedish SF-36 Health Survey I.  
25 Evaluation of data quality, scaling assumptions, reliability and construct validity  
26 across general populations in Sweden. *Soc Sci Med* 1995;41:1349–58.  
27  
28  
29  
30  
31 27. Adams HP Jr, Bendixen BH, Kappelle LJ, et al. Classification of subtype of acute  
32 ischemic stroke. Definitions for use in a multicenter clinical trial. TOAST. *Stroke*.  
33  
34  
35 15 1993;24:35-41.  
36  
37  
38 28. Hulley SB, Cummings SR, Browner WS, et al. Designing clinical research: an  
39 epidemiologic approach. 4th ed. Philadelphia, PA: Lippincott Williams & Wilkins;  
40  
41 2013. Appendix 6D, page 80.  
42  
43  
44  
45 29. European Medicines Agency (2002) ICH harmonised tripartite guideline E6. In:  
46  
47 20 EMA, eds. Note for Guidance on Good Clinical Practice (PMP/ICH/135/95).  
48  
49  
50 30. Gage BF, Waterman AD, Shannon W, et al. Validation of clinical classification  
51 schemes for predicting stroke: results from the National Registry of Atrial Fibrillation.  
52  
53  
54  
55  
56  
57  
58  
59  
60

- 1  
2  
3 31. Socialstyrelsen. [www.socialstyrelsen.se/nationellariktlinjer/hjartsjukvard](http://www.socialstyrelsen.se/nationellariktlinjer/hjartsjukvard) Retrieved  
4 on 8th of September 2017.  
5  
6  
7 32. Levin LÅ, Husberg M, Sobocinski PD, et al. A cost-effectiveness analysis of  
8 screening for silent atrial fibrillation after ischaemic stroke. *Europace* 2015;17:207-14.  
9  
10  
11  
12 5 33. Stahrenberg R, Weber-Krüger M, J. Seegers J, et al. Enhanced detection of  
13 paroxysmal atrial fibrillation by early and prolonged continuous holter monitoring in  
14 patients with cerebral ischemia presenting in sinus rhythm. *Stroke* 2010;41:2884-8.  
15  
16  
17 34. Seet RCS, Friedman PA, Rabinstein AA. Prolonged rhythm monitoring for the  
18 detection of occult paroxysmal atrial fibrillation in ischemic stroke of unknown cause.  
19  
20  
21  
22  
23  
24 10 *Circulation* 2011;124:477-86.  
25  
26  
27  
28  
29  
30  
31  
32  
33  
34  
35  
36  
37  
38  
39  
40  
41  
42  
43  
44  
45  
46  
47  
48  
49  
50  
51  
52  
53  
54  
55  
56  
57  
58  
59  
60

Code   

Name: \_\_\_\_\_

Personal ID: \_\_\_\_\_ - \_\_\_\_\_

Please describe your experience of using the chest- and thumb ECG. Follow the example below to make a clear vertical line.

Exemple: **Correct**Exemple: **Incorrect**

Frågor:

1. In summary, what do you think about the usage of the chest- and thumb ECG?

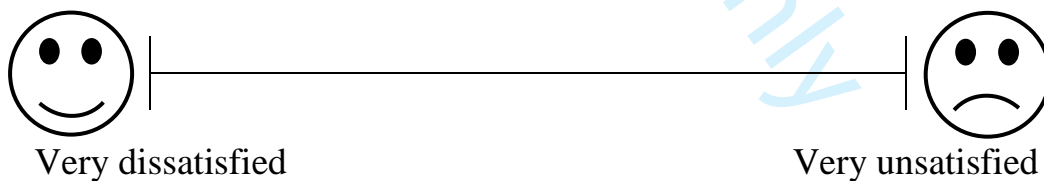

2. How was the technical feasibility of the chest- and thumb ECG?



3. Did you remember to use the chest- and thumb ECG as scheduled?



4. How was it physically to apply the chest- and thumb ECG?



5. Did the ECG monitoring affect your feeling of security?

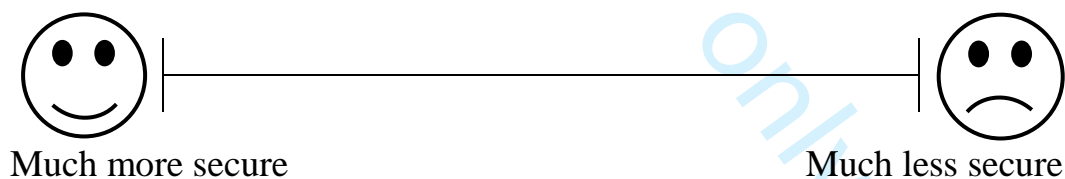

6. Did you need help from others to perform the ECG-monitoring?



7. Would you recommend other stroke patients to use the chest- and thumb ECG monitoring?



Would you like to add any comment about using the chest- and thumb ECG?  
Please use the box below.

What symptoms remain after your stroke? Please underline the alternative that describes this best.

|                                      |        |          |        |    |
|--------------------------------------|--------|----------|--------|----|
| Speech ability impairment:           | Severe | Moderate | Mildly | No |
| Impairment of ability to understand: | Severe | Moderate | Mild   | No |
| Arm weakness:                        | Severe | Moderate | Mild   | No |
| Leg weakness:                        | Severe | Moderate | Mild   | No |
| Decreased sensibility:               | Severe | Moderate | Mild   | No |
| Memory deficit:                      | Severe | Moderate | Mild   | No |
| Tiredness:                           | Severe | Moderate | Mild   | No |

Do you want add any further information, please use the box below.



SPIRIT 2013 Checklist: Recommended items to address in a clinical trial protocol and related documents\*

| Section/item                            | Item No         | Description                                                                                                                                                                                                                                                                              |
|-----------------------------------------|-----------------|------------------------------------------------------------------------------------------------------------------------------------------------------------------------------------------------------------------------------------------------------------------------------------------|
| <b>Administrative information</b>       |                 |                                                                                                                                                                                                                                                                                          |
| page 1, line 1 Title                    | 1               | Descriptive title identifying the study design, population, interventions, and, if applicable, trial acronym                                                                                                                                                                             |
| page 3, line 1 Trial registration       | 2a              | Trial identifier and registry name. If not yet registered, name of intended registry                                                                                                                                                                                                     |
| NA                                      | 2b              | All items from the World Health Organization Trial Registration Data Set                                                                                                                                                                                                                 |
| page 3, line 1 Protocol version         | 3               | Date and version identifier                                                                                                                                                                                                                                                              |
| page 13, line 1 Funding                 | 4               | Sources and types of financial, material, and other support                                                                                                                                                                                                                              |
| Roles and responsibilities              | page 1, line 5a | Names, affiliations, and roles of protocol contributors                                                                                                                                                                                                                                  |
| page 1, line 5b                         |                 | Name and contact information for the trial sponsor                                                                                                                                                                                                                                       |
| page 13, line 5                         |                 | Role of study sponsor and funders, if any, in study design; collection, management, analysis, and interpretation of data; writing of the report; and the decision to submit the report for publication, including whether they will have ultimate authority over any of these activities |
| page 10, line 1 5d                      |                 | Composition, roles, and responsibilities of the coordinating centre, steering committee, endpoint adjudication committee, data management team, and other individuals or groups overseeing the trial, if applicable (see Item 21a for data monitoring committee)                         |
| <b>Introduction</b>                     |                 |                                                                                                                                                                                                                                                                                          |
| page 9, line 1 Background and rationale | 6a              | Description of research question and justification for undertaking the trial, including summary of relevant studies (published and unpublished) examining benefits and harms for each intervention                                                                                       |
| NA                                      | 6b              | Explanation for choice of comparators                                                                                                                                                                                                                                                    |
| page 7, line 10 Objectives              | 7               | Specific objectives or hypotheses                                                                                                                                                                                                                                                        |
| page 1, line 1 Trial design             | 8               | Description of trial design including type of trial (eg, parallel group, crossover, factorial, single group), allocation ratio, and framework (eg, superiority, equivalence, noninferiority, exploratory)                                                                                |

## Methods: Participants, interventions, and outcomes

|    |                     |                         |     |
|----|---------------------|-------------------------|-----|
| 1  |                     |                         |     |
| 2  |                     |                         |     |
| 3  |                     |                         |     |
| 4  | page 7<br>line 15   | Study setting           | 9   |
| 5  |                     |                         |     |
| 6  |                     |                         |     |
| 7  |                     |                         |     |
| 8  | page 7<br>line 20   | Eligibility criteria    | 10  |
| 9  |                     |                         |     |
| 10 |                     |                         |     |
| 11 |                     |                         |     |
| 12 |                     |                         |     |
| 13 | page 9<br>line 15   | Interventions           | 11a |
| 14 |                     |                         |     |
| 15 |                     |                         |     |
| 16 | MA                  |                         | 11b |
| 17 |                     |                         |     |
| 18 |                     |                         |     |
| 19 |                     |                         |     |
| 20 |                     |                         |     |
| 21 | MA                  |                         | 11c |
| 22 |                     |                         |     |
| 23 |                     |                         |     |
| 24 |                     |                         |     |
| 25 |                     |                         | 11d |
| 26 | MA                  |                         |     |
| 27 |                     |                         |     |
| 28 | page 9,<br>line 1   | Outcomes                | 12  |
| 29 |                     |                         |     |
| 30 |                     |                         |     |
| 31 |                     |                         |     |
| 32 |                     |                         |     |
| 33 |                     |                         |     |
| 34 |                     |                         |     |
| 35 |                     |                         |     |
| 36 | page 7,<br>line 15  | Participant<br>timeline | 13  |
| 37 |                     |                         |     |
| 38 |                     |                         |     |
| 39 |                     |                         |     |
| 40 | page 10,<br>line 13 | Sample size             | 14  |
| 41 |                     |                         |     |
| 42 |                     |                         |     |
| 43 |                     |                         |     |
| 44 |                     |                         |     |
| 45 | page 15<br>line 17  | Recruitment             | 15  |
| 46 |                     |                         |     |
| 47 |                     |                         |     |

## Methods: Assignment of interventions (for controlled trials)

### Allocation:

|    |    |                        |     |
|----|----|------------------------|-----|
| 51 |    |                        |     |
| 52 | MA | Sequence<br>generation | 16a |
| 53 |    |                        |     |
| 54 |    |                        |     |
| 55 |    |                        |     |
| 56 |    |                        |     |
| 57 |    |                        |     |
| 58 |    |                        |     |
| 59 |    |                        |     |
| 60 |    |                        |     |



|    |    |                                  |     |                                                                                                                                                                                                           |
|----|----|----------------------------------|-----|-----------------------------------------------------------------------------------------------------------------------------------------------------------------------------------------------------------|
| 1  |    |                                  |     |                                                                                                                                                                                                           |
| 2  | MA | Allocation concealment mechanism | 16b | Mechanism of implementing the allocation sequence (eg, central telephone; sequentially numbered, opaque, sealed envelopes), describing any steps to conceal the sequence until interventions are assigned |
| 3  |    |                                  |     |                                                                                                                                                                                                           |
| 4  |    |                                  |     |                                                                                                                                                                                                           |
| 5  |    |                                  |     |                                                                                                                                                                                                           |
| 6  |    |                                  |     |                                                                                                                                                                                                           |
| 7  | MA | Implementation                   | 16c | Who will generate the allocation sequence, who will enrol participants, and who will assign participants to interventions                                                                                 |
| 8  |    |                                  |     |                                                                                                                                                                                                           |
| 9  |    |                                  |     |                                                                                                                                                                                                           |
| 10 | MA | Blinding (masking)               | 17a | Who will be blinded after assignment to interventions (eg, trial participants, care providers, outcome assessors, data analysts), and how                                                                 |
| 11 |    |                                  |     |                                                                                                                                                                                                           |
| 12 |    |                                  |     |                                                                                                                                                                                                           |
| 13 |    |                                  |     |                                                                                                                                                                                                           |
| 14 |    |                                  |     |                                                                                                                                                                                                           |
| 15 |    |                                  | 17b | If blinded, circumstances under which unblinding is permissible, and procedure for revealing a participant's allocated intervention during the trial                                                      |
| 16 | MA |                                  |     |                                                                                                                                                                                                           |
| 17 |    |                                  |     |                                                                                                                                                                                                           |
| 18 |    |                                  |     |                                                                                                                                                                                                           |
| 19 |    |                                  |     |                                                                                                                                                                                                           |

### Methods: Data collection, management, and analysis

|    |                  |                         |     |                                                                                                                                                                                                                                                                                                                                                                                                              |
|----|------------------|-------------------------|-----|--------------------------------------------------------------------------------------------------------------------------------------------------------------------------------------------------------------------------------------------------------------------------------------------------------------------------------------------------------------------------------------------------------------|
| 20 |                  |                         |     |                                                                                                                                                                                                                                                                                                                                                                                                              |
| 21 | page 10, line 1  | Data collection methods | 18a | Plans for assessment and collection of outcome, baseline, and other trial data, including any related processes to promote data quality (eg, duplicate measurements, training of assessors) and a description of study instruments (eg, questionnaires, laboratory tests) along with their reliability and validity, if known. Reference to where data collection forms can be found, if not in the protocol |
| 22 |                  |                         |     |                                                                                                                                                                                                                                                                                                                                                                                                              |
| 23 |                  |                         |     |                                                                                                                                                                                                                                                                                                                                                                                                              |
| 24 |                  |                         |     |                                                                                                                                                                                                                                                                                                                                                                                                              |
| 25 |                  |                         |     |                                                                                                                                                                                                                                                                                                                                                                                                              |
| 26 |                  |                         |     |                                                                                                                                                                                                                                                                                                                                                                                                              |
| 27 |                  |                         |     |                                                                                                                                                                                                                                                                                                                                                                                                              |
| 28 |                  |                         |     |                                                                                                                                                                                                                                                                                                                                                                                                              |
| 29 |                  |                         |     |                                                                                                                                                                                                                                                                                                                                                                                                              |
| 30 | MA               |                         | 18b | Plans to promote participant retention and complete follow-up, including list of any outcome data to be collected for participants who discontinue or deviate from intervention protocols                                                                                                                                                                                                                    |
| 31 |                  |                         |     |                                                                                                                                                                                                                                                                                                                                                                                                              |
| 32 |                  |                         |     |                                                                                                                                                                                                                                                                                                                                                                                                              |
| 33 |                  |                         |     |                                                                                                                                                                                                                                                                                                                                                                                                              |
| 34 | page 10, line 21 | Data management         | 19  | Plans for data entry, coding, security, and storage, including any related processes to promote data quality (eg, double data entry; range checks for data values). Reference to where details of data management procedures can be found, if not in the protocol                                                                                                                                            |
| 35 |                  |                         |     |                                                                                                                                                                                                                                                                                                                                                                                                              |
| 36 | page 11, line 5  |                         |     |                                                                                                                                                                                                                                                                                                                                                                                                              |
| 37 |                  |                         |     |                                                                                                                                                                                                                                                                                                                                                                                                              |
| 38 |                  |                         |     |                                                                                                                                                                                                                                                                                                                                                                                                              |
| 39 | page 10, line 15 | Statistical methods     | 20a | Statistical methods for analysing primary and secondary outcomes. Reference to where other details of the statistical analysis plan can be found, if not in the protocol                                                                                                                                                                                                                                     |
| 40 |                  |                         |     |                                                                                                                                                                                                                                                                                                                                                                                                              |
| 41 |                  |                         |     |                                                                                                                                                                                                                                                                                                                                                                                                              |
| 42 |                  |                         |     |                                                                                                                                                                                                                                                                                                                                                                                                              |
| 43 |                  |                         |     |                                                                                                                                                                                                                                                                                                                                                                                                              |
| 44 | page 10, line 15 |                         | 20b | Methods for any additional analyses (eg, subgroup and adjusted analyses)                                                                                                                                                                                                                                                                                                                                     |
| 45 |                  |                         |     |                                                                                                                                                                                                                                                                                                                                                                                                              |
| 46 |                  |                         |     |                                                                                                                                                                                                                                                                                                                                                                                                              |
| 47 |                  |                         | 20c | Definition of analysis population relating to protocol non-adherence (eg, as randomised analysis), and any statistical methods to handle missing data (eg, multiple imputation)                                                                                                                                                                                                                              |
| 48 | MA               |                         |     |                                                                                                                                                                                                                                                                                                                                                                                                              |
| 49 |                  |                         |     |                                                                                                                                                                                                                                                                                                                                                                                                              |
| 50 |                  |                         |     |                                                                                                                                                                                                                                                                                                                                                                                                              |
| 51 |                  |                         |     |                                                                                                                                                                                                                                                                                                                                                                                                              |

### Methods: Monitoring

|    |                 |                 |     |                                                                                                                                                                                                                                                                                                                                       |
|----|-----------------|-----------------|-----|---------------------------------------------------------------------------------------------------------------------------------------------------------------------------------------------------------------------------------------------------------------------------------------------------------------------------------------|
| 52 |                 |                 |     |                                                                                                                                                                                                                                                                                                                                       |
| 53 | page 10, line 5 | Data monitoring | 21a | Composition of data monitoring committee (DMC); summary of its role and reporting structure; statement of whether it is independent from the sponsor and competing interests; and reference to where further details about its charter can be found, if not in the protocol. Alternatively, an explanation of why a DMC is not needed |
| 54 |                 |                 |     |                                                                                                                                                                                                                                                                                                                                       |
| 55 |                 |                 |     |                                                                                                                                                                                                                                                                                                                                       |
| 56 |                 |                 |     |                                                                                                                                                                                                                                                                                                                                       |
| 57 |                 |                 |     |                                                                                                                                                                                                                                                                                                                                       |
| 58 |                 |                 |     |                                                                                                                                                                                                                                                                                                                                       |
| 59 |                 |                 |     |                                                                                                                                                                                                                                                                                                                                       |
| 60 |                 |                 |     |                                                                                                                                                                                                                                                                                                                                       |

1  
2  
3  
4  
5  
6  
7  
8  
9  
10  
11  
12  
13  
14  
15  
16  
17  
18  
19  
20  
21  
22  
23  
24  
25  
26  
27  
28  
29  
30  
31  
32  
33  
34  
35  
36  
37  
38  
39  
40  
41  
42  
43  
44  
45  
46  
47  
48  
49  
50  
51  
52  
53  
54  
55  
56  
57  
58  
59  
60

MA

21b Description of any interim analyses and stopping guidelines, including who will have access to these interim results and make the final decision to terminate the trial

MA

Harms

22 Plans for collecting, assessing, reporting, and managing solicited and spontaneously reported adverse events and other unintended effects of trial interventions or trial conduct

MA

Auditing

23 Frequency and procedures for auditing trial conduct, if any, and whether the process will be independent from investigators and the sponsor

**Ethics and dissemination**

page 11, line 2

Research ethics approval

24 Plans for seeking research ethics committee/institutional review board (REC/IRB) approval

MA

Protocol amendments

25 Plans for communicating important protocol modifications (eg, changes to eligibility criteria, outcomes, analyses) to relevant parties (eg, investigators, REC/IRBs, trial participants, trial registries, journals, regulators)

page 11, line 7

Consent or assent

26a Who will obtain informed consent or assent from potential trial participants or authorised surrogates, and how (see Item 32)

MA

26b Additional consent provisions for collection and use of participant data and biological specimens in ancillary studies, if applicable

page 11, line 5

Confidentiality

27 How personal information about potential and enrolled participants will be collected, shared, and maintained in order to protect confidentiality before, during, and after the trial

page 13, line 12

Declaration of interests

28 Financial and other competing interests for principal investigators for the overall trial and each study site

page 10, line 11

Access to data

29 Statement of who will have access to the final trial dataset, and disclosure of contractual agreements that limit such access for investigators

MA

Ancillary and post-trial care

30 Provisions, if any, for ancillary and post-trial care, and for compensation to those who suffer harm from trial participation

page 11, line 7

Dissemination policy

31a Plans for investigators and sponsor to communicate trial results to participants, healthcare professionals, the public, and other relevant groups (eg, via publication, reporting in results databases, or other data sharing arrangements), including any publication restrictions

MA

31b Authorship eligibility guidelines and any intended use of professional writers

MA

31c Plans, if any, for granting public access to the full protocol, participant-level dataset, and statistical code

**Appendices**

|    |                            |    |                                                                                                                                                                                                |
|----|----------------------------|----|------------------------------------------------------------------------------------------------------------------------------------------------------------------------------------------------|
| MA | Informed consent materials | 32 | Model consent form and other related documentation given to participants and authorised surrogates                                                                                             |
| MA | Biological specimens       | 33 | Plans for collection, laboratory evaluation, and storage of biological specimens for genetic or molecular analysis in the current trial and for future use in ancillary studies, if applicable |

---

\*It is strongly recommended that this checklist be read in conjunction with the SPIRIT 2013 Explanation & Elaboration for important clarification on the items. Amendments to the protocol should be tracked and dated. The SPIRIT checklist is copyrighted by the SPIRIT Group under the Creative Commons "Attribution-NonCommercial-NoDerivs 3.0 Unported" license.
