# Supplementary material for: A protocol for a prospective observational study using chest and thumb ECG: transient ECG assessment in stroke evaluation (TEASE) in Sweden
Source: PubMed Central journal article supplement — BMJ Open. 2018 Apr 3;8(4):e019933. doi: 10.1136/bmjopen-2017-019933 (PMC5892735; doi:10.1136/bmjopen-2017-019933), 2018-04-03
Supplement: bmjopen-2017-019933supp001.pdf [file bmjopen-2017-019933supp001.pdf]

Code

Name: \_\_\_\_\_

Personal ID: \_\_\_\_\_ - \_\_\_\_\_

Please describe your experience of using the chest- and thumb ECG. Follow the example below to make a clear vertical line.

Exemple: **Correct**

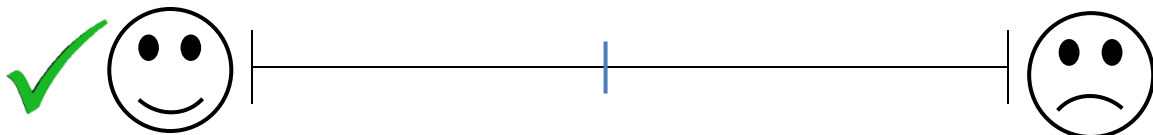

Exemple: **Incorrect**

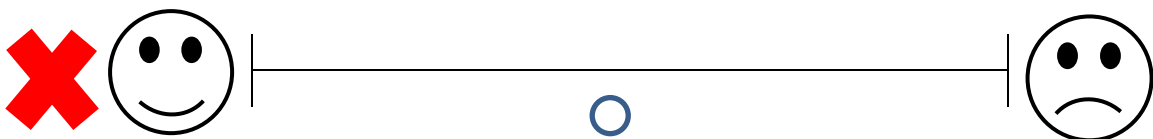

**Frågor:**

1. In summary, what do you think about the usage of the chest- and thumb ECG?

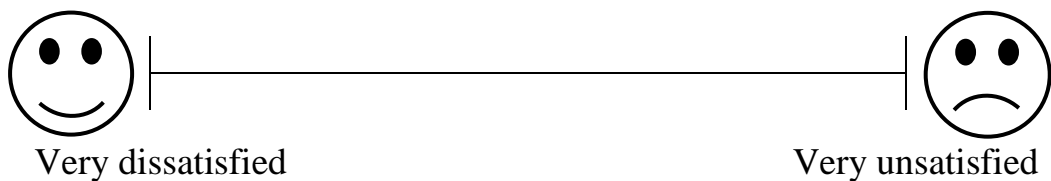

2. How was the technical feasibility of the chest- and thumb ECG?

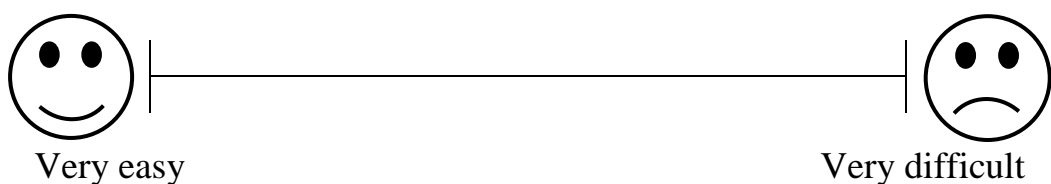

3. Did you remember to use the chest- and thumb ECG as scheduled?

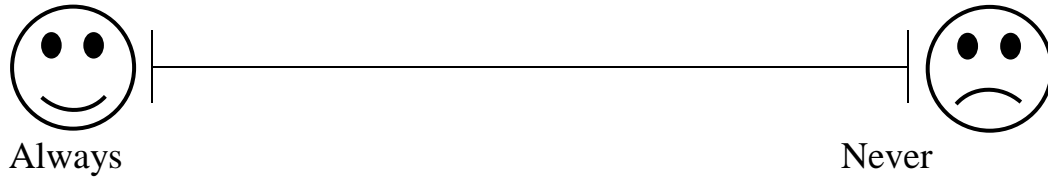

4. How was it physically to apply the chest- and thumb ECG?

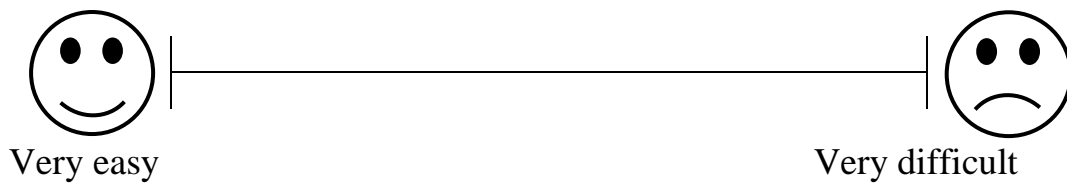

5. Did the ECG monitoring affect your feeling of security?

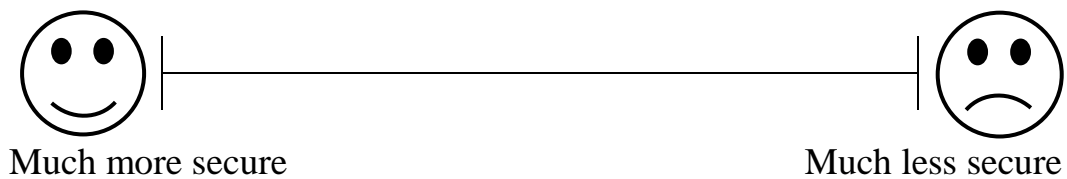

6. Did you need help from others to perform the ECG-monitoring?

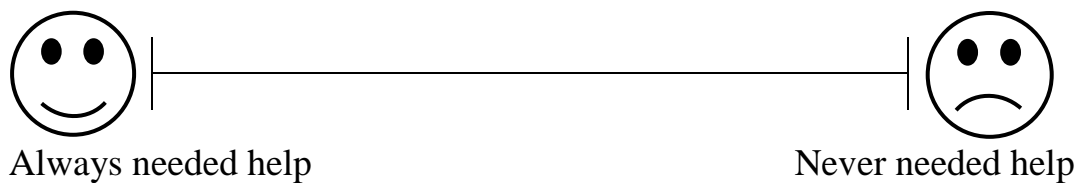

7. Would you recommend other stroke patients to use the chest- and thumb ECG monitoring?

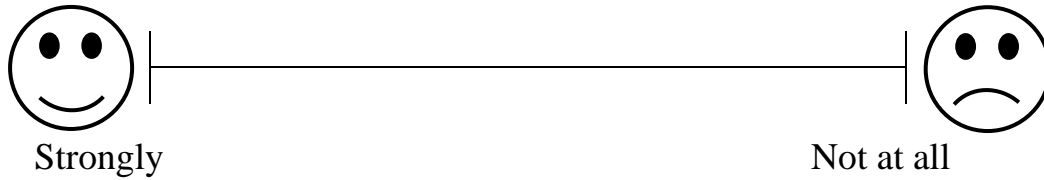

Would you like to add any comment about using the chest- and thumb ECG?  
Please use the box below.

What symptoms remain after your stroke? Please underline the alternative that describes this best.

|                                      |        |          |        |    |
|--------------------------------------|--------|----------|--------|----|
| Speech ability impairment:           | Severe | Moderate | Mildly | No |
| Impairment of ability to understand: | Severe | Moderate | Mild   | No |
| Arm weakness:                        | Severe | Moderate | Mild   | No |
| Leg weakness:                        | Severe | Moderate | Mild   | No |
| Decreased sensibility:               | Severe | Moderate | Mild   | No |
| Memory deficit:                      | Severe | Moderate | Mild   | No |
| Tiredness:                           | Severe | Moderate | Mild   | No |

Do you want add any further information, please use the box below.
